# Supplementary material for: Eocene to Miocene paleoclimate reconstruction of the northern Tibetan Plateau: constraints from mineralogy, carbon and oxygen isotopes of lacustrine carbonates in the western Qaidam Basin
Source: Frontiers journal article supplement (doi:10.3389/feart.2023.1217304), 2023-06-19
Supplement: Table_1.XLSX [file Table_1.XLSX]

## Sheet: E31-N22
			age									isotopic data		Percentage content (%)
Number	Formation	Samples	age(Ma)	Top depth of formation where sample is located(m)	Bottom depth of Formation(m)	Formation thickness(m)	Proportion of sample in Formation	Lithology	Well Number	location	Depth of samples (m)	δ13C(‰,PDB)	δ18O(‰,PDB)	quartz	plagioclase	microcline	mica	calcite	dolomite	ankerite	aragonite	anhydrite	glauberite	halite	hemetite	chlorite	analcite	pyrite	TPC(total precipitated components)
1	N22	624	8.81756	620	1315	695	0.0921727	gray muddy siltstone	Yingdong105	Yingdong	684.06	-2.17	-9.55	0.29	0.17	0.06	0.24	0.09	0	0	0	0	0	0	0	0.15	0	0	0.09
2		616	8.82595	370	995.1	625.1	0.0934251	Brownish-red muddy siltstone	Sha37	Youshashan	428.4	-1.05	-10.06	0.34	0.18	0.06	0.14	0.11	0	0	0	0	0	0	0	0.16	0	0	0.11
3		601	9.28811	895	1751.5	856.5	0.162405	gray calcareous mudstone	Liang101	Xiaoliangshan	1034.1	-0.01	-2.29	0.18	0.1	0.04	0.16	0.12	0	0	0.22	0	0	0.03	0	0.11	0.04	0	0.37
4		602	9.32019	895	1751.5	856.5	0.167192	gray calcareous mudstone	Liang101	Xiaoliangshan	1038.2	-1.29	-5.46	0.25	0.12	0.06	0.21	0.18	0	0	0	0	0	0.03	0	0.12	0.03	0	0.21
5		625	10.7017	620	1315	695	0.373381	light-gray muddy siltstone	Yingdong105	Yingdong	879.5	-1.93	-10.39	0.4	0.15	0.06	0.17	0.09	0	0	0	0	0	0	0	0.12	0	0	0.09
6		609	10.9434	919	1797.6	878.6	0.409458	gray mudstone	Liangzhong3-3	Xiaoliangshan	1278.75	-2.25	-5.78	0.26	0.12	0.04	0.19	0.18	0	0	0	0	0	0.03	0	0.11	0.05	0.02	0.21
7		621	10.9695	500	1241	741	0.41336	gray calcareous siltstone	Sha45	Youshashan	806.3	-4.51	-8.3	0.3	0.17	0.07	0.07	0.32	0	0	0	0	0	0	0	0.07	0	0.01	0.32
8		610	10.9929	919	1797.6	878.6	0.416856	gray calcareous mudstone	Liangzhong3-3	Xiaoliangshan	1285.25	-0.27	-2.72	0.17	0.1	0.03	0.24	0.18	0	0.14	0	0	0	0.03	0	0.07	0	0.04	0.35
9		603	11.4163	1152	2012.5	860.5	0.480046	light-gray calcareous mudstone	Liang105	Xiaoliangshan	1565.08	-1.56	-5.26	0.22	0.13	0.04	0.18	0.29	0	0	0	0	0	0.02	0	0.11	0	0.02	0.31
10		611-1	11.4665	919	1797.6	878.6	0.487537	gray calcareous mudstone	Liangzhong3-3	Xiaoliangshan	1347.35	-1.41	-5.6	0.25	0.13	0.03	0.17	0.21	0	0	0	0	0	0.03	0	0.13	0.03	0.02	0.24
11		611	11.4844	919	1797.6	878.6	0.490212	gray mudstone	Liangzhong3-3	Xiaoliangshan	1349.7	-1.8	-6.5	0.27	0.12	0.04	0.19	0.22	0	0	0	0	0	0	0	0.14	0	0.01	0.22
12		606	11.5975	1271.4	2150	878.6	0.507091	gray mudstone	Liang108	Xiaoliangshan	1716.93	-0.63	-3.7	0.21	0.11	0.04	0.25	0.17	0	0.07	0	0	0	0.03	0	0.09	0	0.04	0.27
13		612	11.6446	919	1797.6	878.6	0.514113	gray mudstone	Liangzhong3-3	Xiaoliangshan	1370.7	-2.01	-5.25	0.28	0.14	0.03	0.17	0.21	0	0	0	0	0	0	0	0.13	0.02	0.02	0.21
14		604	11.6505	1152	2012.5	860.5	0.515003	gray mudstone	Liang105	Xiaoliangshan	1595.16	-0.27	0.2	0.23	0.13	0.04	0.16	0.09	0	0.08	0.12	0	0	0.03	0	0.09	0	0.04	0.32
15		607	11.7638	1271.4	2150	878.6	0.531903	light-gray calcareous mudstone	Liang108	Xiaoliangshan	1738.73	-0.61	-2.25	0.18	0.14	0.03	0.18	0.1	0	0.24	0	0	0	0.03	0	0.09	0	0.02	0.37
16		613	11.7772	919	1797.6	878.6	0.533918	dark-gray calcareous mudstone	Liangzhong3-3	Xiaoliangshan	1388.1	-0.9	-1.34	0.18	0.1	0.04	0.21	0.07	0	0.27	0	0	0	0	0	0.09	0	0.04	0.34
17		622	11.7978	500	1241	741	0.536991	gray muddy siltstone	Sha45	Youshashan	897.91	-4.02	-11.46	0.25	0.17	0.08	0.12	0.3	0	0	0	0	0	0	0	0.08	0	0	0.3
18		605	11.8733	1152	2012.5	860.5	0.548251	gray mudstone	Liang105	Xiaoliangshan	1623.77	-1.22	-7.84	0.27	0.14	0.04	0.27	0.08	0	0	0	0	0	0.04	0	0.13	0	0.03	0.12
19		623	12.2166	500	1241	741	0.599487	Brownish muddy siltstone	Sha45	Youshashan	944.22	-3.9	-9.79	0.3	0.12	0.05	0.12	0.31	0	0	0	0	0	0	0	0.1	0	0.01	0.31
20		608	12.322	1271.4	2150	878.6	0.615217	light-gray calcareous mudstone	Liang108	Xiaoliangshan	1811.93	1.01	-3.05	0.21	0.11	0.04	0.14	0.18	0	0.11	0	0	0	0.02	0	0.11	0.04	0.03	0.31
21		614	12.4293	919	1797.6	878.6	0.631232	gray calcareous mudstone	Liangzhong3-3	Xiaoliangshan	1473.6	-1.63	-4.1	0.24	0.09	0.07	0.19	0.2	0	0.05	0	0	0	0	0	0.1	0.04	0.03	0.25
22		627	12.4504	86	714	628	0.634395	Brownish calcareous siltstone	Yingdong201	Yingdong	484.4	-2.25	-10.15	0.36	0.22	0.07	0.14	0.1	0	0	0	0	0	0	0	0.1	0	0.01	0.1
23		615	12.5719	919	1797.6	878.6	0.652515	dark-gray calcareous mudstone	Liangzhong3-3	Xiaoliangshan	1492.3	0.33	-5.42	0.16	0.08	0.03	0.18	0.36	0	0.04	0	0	0	0.03	0	0.07	0.03	0.02	0.43
24		618	12.5842	350	1180	830	0.654361	light-gray muddy siltstone	Sha39	Youshashan	893.12	-7.49	-8.53	0.39	0.2	0.08	0.09	0.17	0	0	0	0	0	0	0	0.06	0	0.01	0.17
25		626	13.5201	240	868	628	0.794045	Brownish fine sandstone	Yingdong107	Yingdong	738.66	-5.15	-13.16	0.34	0.26	0.06	0.12	0.16	0	0	0	0	0	0	0	0.06	0	0	0.16
26		617	13.8235	440	1560	1120	0.839321	Brownish silty mudstone	Sha38	Youshashan	1380.04	-2.64	-9.71	0.33	0.16	0.04	0.23	0.11	0	0	0	0	0	0	0	0.11	0	0.01	0.11
27		619	14.557	306.5	881.8	575.3	0.948809	Brownish muddy siltstone	Sha40	Youshashan	852.35	-2.68	-9.36	0.32	0.23	0.05	0.13	0.12	0	0	0	0	0	0	0	0.14	0	0	0.12
28		516	14.766		1035		0.98	gray mudstone	Yingdong104	Yingdong	1016.32	-2.38	-9.5	0.3	0.16	0.05	0.23	0.08	0	0	0	0	0	0.04	0	0.14	0	0	0.12
29		620	14.7672	306.5	881.8	575.3	0.980184	Brownish silty mudstone	Sha40	Youshashan	870.4	-2.55	-10.17	0.36	0.17	0.05	0.18	0.09	0	0	0	0	0	0	0	0.14	0	0.02	0.09
30	N21	501	16.0833	1950.87	2840	889.133	0.166667	gray mudstone	Lv11	Lvcaotan	2203.95	-1.05	-8.95	0.26	0.15	0.05	0.23	0.13	0	0	0	0	0	0	0.02	0.17	0	0	0.13
31		508	16.4778	934	2250	1316	0.222222	brownish-gray muddy siltstone	Yingdong102	Yingdong	1059.88	-2.05	-9.76	0.33	0.19	0.06	0.11	0.13	0	0	0	0	0	0	0	0.17	0	0	0.13
32		509	16.4778	934	2250	1316	0.222222	light-brown muddy siltstone	Yingdong102	Yingdong	1078.98	-1.72	-9.14	0.32	0.28	0.08	0.08	0.16	0	0	0	0	0	0	0	0.08	0	0	0.16
33		517	16.8722	1035	2562	1527	0.277778	gray mudstone	Yingdong104	Yingdong	1254.16	-2.17	-9.1	0.35	0.18	0.08	0.15	0.11	0	0	0	0	0	0	0	0.13	0	0	0.11
34		510	17.2667	934	2250	1316	0.333333	gray muddy siltstone	Yingdong102	Yingdong	1473.36	-2.75	-9.02	0.35	0.21	0.09	0.08	0.18	0	0	0	0	0	0	0	0.1	0	0	0.18
35		513	17.6611	921	1750	829	0.388889	light-gray silty mudstone	Yingdong103	Yingdong	1300.07	-3.61	-8.51	0.31	0.19	0.06	0.16	0.12	0	0	0	0	0	0	0	0.16	0	0	0.12
36		511	18.0556	934	2250	1316	0.444444	light-gray muddy siltstone	Yingdong102	Yingdong	1261.61	-2.83	-9.5	0.34	0.23	0.07	0.08	0.17	0	0	0	0	0	0	0	0.1	0	0	0.17
37		512	18.0556	934	2250	1316	0.444444	gray muddy fine-sandstone	Yingdong102	Yingdong	1317.15	-2.34	-9.46	0.4	0.27	0.07	0.06	0.14	0	0	0	0	0	0	0	0.06	0	0	0.14
38		502	18.45	976	2266	1290	0.5	gray calcareous mudstone	Sha41	Youshashan	1445.45	-2.42	-8.21	0.25	0.1	0.04	0.2	0.26	0	0	0	0	0	0	0.02	0.13	0	0	0.26
39		514	18.45	921	1750	829	0.5	gray muddy siltstone	Yingdong103	Yingdong	1402.81	-1.73	-9.5	0.33	0.18	0.05	0.15	0.13	0	0	0	0	0	0	0	0.16	0	0	0.13
40		503	18.8444	976	2266	1290	0.555556	gray silty mudstone	Sha41	Youshashan	1483.27	-1.1	-8.81	0.33	0.22	0.05	0.13	0.09	0	0	0	0	0	0	0	0.17	0	0	0.09
41		504	19.2389	976	2266	1290	0.611111	dark-gray mudstone	Sha41	Youshashan	1528	-1.67	-9.07	0.29	0.15	0.04	0.22	0.13	0	0	0	0	0	0	0.02	0.15	0	0	0.13
42		505	19.6333	976	2266	1290	0.666667	dark-gray mudstone	Sha41	Youshashan	1553.9	-2.01	-9.05	0.35	0.18	0.05	0.17	0.11	0	0	0	0	0	0	0	0.14	0	0	0.11
43		518	19.6333	1065	2313	1248	0.666667	gray muddy siltstone	Yingdong106	Yingdong	1695.86	-2.88	-8.46	0.33	0.2	0.07	0.07	0.25	0	0	0	0	0	0	0.01	0.06	0	0	0.25
44		519	20.4222	1065	2313	1248	0.777778	gray silty mudstone	Yingdong106	Yingdong	1881.91	-1.61	-6.12	0.35	0.19	0.04	0.18	0.11	0	0	0	0	0	0	0	0.12	0	0	0.11
45		506	20.8167	976	2266	1290	0.833333	dark-gray calcareous mudstone	Sha41	Youshashan	1982.46	-0.93	-7.37	0.24	0.13	0.05	0.18	0.29	0	0	0	0	0	0	0	0.09	0	0.03	0.29
46		515	20.8167	921	1750	829	0.833333	gray calcareous mudstone	Yingdong103	Yingdong	1813.9	-0.17	-5.72	0.21	0.13	0.03	0.17	0.26	0	0.06	0	0	0	0	0	0.09	0.03	0.03	0.32
47		507	21.2111	976	2266	1290	0.888889	gray muddy siltstone	Sha41	Youshashan	2058.41	-3.16	-8.08	0.3	0.19	0.03	0.11	0.27	0	0	0	0	0	0	0	0.1	0	0	0.27
48		520	21.5529	1817	2922	1105	0.937023	gray calcareous mudstone	Zha11	Zhahaquan	2852.41	-0.61	-5.54	0.2	0.12	0.04	0.25	0.27	0	0	0	0	0	0	0	0.12	0	0	0.27
49		521	21.6641	1816.64	2845	1028.36	0.952692	gray calcareous mudstone	Zha102	Zhahaquan	2796.35	-1.66	-7.1	0.29	0.16	0.03	0.12	0.16	0	0.11	0	0	0	0	0	0.1	0.03	0	0.27
50		523	21.6776	1866.64	2895	1028.36	0.954598	greyish-green limestone	Zha3	Zhahaquan	2848.31	0.7	-5.36	0.12	0.09	0.04	0.16	0.17	0	0.17	0.18	0	0	0	0	0.07	0	0	0.52
51		522	21.7314	1881.64	2910	1028.36	0.962173	gray limestone	Zha2	Zhahaquan	2871.1	1.97	-6.39	0.15	0.07	0.03	0.15	0.27	0	0.06	0.2	0	0	0	0	0.08	0	0	0.53
52	N1	402	22.4805	2907.95	3587.1	679.15	0.0505779	gray silty mudstone	Zha2	Zhahaquan	2942.3	-0.38	-8.78	0.27	0.15	0.04	0.14	0.28	0	0	0	0	0	0	0	0.12	0	0	0.28
53		403	23.5468	2895	3561.64	666.64	0.162817	greyish-green siltstone	Zha3	Zhahaquan	3003.54	-3.68	-10.08	0.38	0.28	0.07	0.09	0.09	0	0	0	0	0	0	0	0.08	0	0	0.09
54		405	23.5758	2907.95	3587.1	679.15	0.165869	brownish-gray fine sandstone	Zha2	Zhahaquan	3020.6	-1.91	-10.35	0.36	0.35	0.05	0.06	0.09	0	0	0	0	0	0	0	0.05	0.03	0	0.09
55		407	23.6667	2907.95	3587.1	679.15	0.17544	light-brown silty mudstone	Zha2	Zhahaquan	3027.1	-3.12	-9.84	0.35	0.19	0.06	0.16	0.07	0	0	0	0	0	0	0	0.11	0.06	0	0.07
56		404	23.6857	2895	3561.64	666.64	0.177442	light-gray muddy siltstone	Zha3	Zhahaquan	3013.29	-3.42	-10.3	0.32	0.28	0.09	0.09	0.15	0	0	0	0	0	0	0	0.08	0	0	0.15
57		408	23.8052	2907.95	3587.1	679.15	0.190017	light-brown muddy siltstone	Zha2	Zhahaquan	3037	-1.61	-6.66	0.21	0.12	0.04	0.35	0.09	0	0	0	0	0	0	0	0.15	0.04	0	0.09
58		406	23.8318	2895	3561.64	666.64	0.192818	dark-gray silty limestone	Zha3	Zhahaquan	3023.54	0.32	-8.63	0.17	0.12	0.03	0.2	0.41	0	0	0	0	0	0	0	0.07	0	0	0.41
59		411	23.8811	3215	3954.6	739.6	0.198012	gray muddy siltstone	Zha7	Zhahaquan	3361.45	0.13	-6.59	0.2	0.13	0.03	0.11	0.37	0	0.06	0	0	0	0	0	0.05	0.04	0	0.43
60		409	24.909	2907.95	3587.1	679.15	0.306206	brownish-gray muddy siltstone	Zha2	Zhahaquan	3115.91	-2.25	-9.81	0.33	0.27	0.07	0.11	0.07	0	0	0	0	0	0	0	0.12	0.03	0	0.07
61		410	25.1905	3260	3984.62	724.616	0.335847	light-brown mudstone	Zha207	Zhahaquan	3503.36	-3.23	-8.09	0.33	0.24	0.04	0.1	0.14	0	0.05	0	0	0	0	0	0.08	0.02	0	0.19
62		413	25.4082	3260	3984.62	724.616	0.358755	brownish-gray muddy siltstone	Zha207	Zhahaquan	3519.96	-1.74	-8.63	0.34	0.26	0.06	0.13	0.09	0	0	0	0	0	0	0	0.1	0.03	0	0.09
63		414	25.9145	3030	3734.03	704.03	0.412056	dark-gray mudstone	Zha4	Zhahaquan	3320.1	-0.25	-7.61	0.3	0.18	0.05	0.13	0.17	0	0	0	0	0	0	0	0.1	0.05	0.02	0.17
64		412	25.9184	2420	3045	625	0.412464	gray mudstone	Zha8	Zhahaquan	2677.79	-2.66	-9.28	0.3	0.22	0.06	0.12	0.11	0	0	0	0	0	0	0	0.08	0.08	0.03	0.11
65		415	26.1034	3030	3734.03	704.03	0.431942	gray muddy siltstone	Zha4	Zhahaquan	3334.1	-0.34	-8.36	0.26	0.2	0.04	0.11	0.26	0	0	0	0	0	0	0	0.07	0.04	0.02	0.26
66		416	26.953	2915	3599.74	684.74	0.521366	gray mudstone	Zha201	Zhahaquan	3272	-1.93	-9.35	0.34	0.19	0.05	0.14	0.12	0	0	0	0	0	0	0	0.1	0.05	0.01	0.12
67		417	27.0233	2895	3561.64	666.64	0.528771	gray mudstone	Zha3	Zhahaquan	3247.5	-2.45	-10.46	0.35	0.25	0.06	0.08	0.15	0	0	0	0	0	0	0	0.07	0.03	0.01	0.15
68		429	27.1368	2973.35	3679.04	705.69	0.540719	gray limestone	Zha204	Zhahaquan	3354.93	-1.16	-7.14	0.17	0.09	0.04	0.1	0.24	0	0.26	0	0	0	0	0	0.08	0	0.02	0.5
69		418	27.1613	3015	3667.72	652.72	0.543296	dark-gray silty mudstone	Zha206	Zhahaquan	3369.62	-1.96	-10.24	0.29	0.15	0.05	0.22	0.09	0	0	0	0	0	0	0	0.11	0.07	0.03	0.09
70		419	27.4225	2907.95	3587.1	679.15	0.570787	gray siltstone	Zha2	Zhahaquan	3295.6	-0.02	-6.5	0.16	0.09	0.03	0.13	0.33	0	0.11	0	0	0	0	0	0.08	0.04	0.03	0.44
71		420	27.4988	2907.95	3587.1	679.15	0.578819	light-gray silty mudstone	Zha2	Zhahaquan	3301.05	0.76	-7.94	0.2	0.13	0.04	0.19	0.28	0	0.04	0	0	0	0	0	0.09	0	0.02	0.32
72		421	27.5014	2930.9	3593.73	662.83	0.579093	light-brown muddy siltstone	Zha203	Zhahaquan	3314.74	-1.1	-8.5	0.28	0.14	0.05	0.19	0.18	0	0	0	0	0	0	0	0.16	0	0	0.18
73		422	27.606	2930.9	3593.73	662.83	0.590106	light-brown silty mudstone	Zha203	Zhahaquan	3322.04	-2.35	-9.93	0.34	0.25	0.05	0.08	0.17	0	0	0	0	0	0	0	0.08	0.03	0.01	0.17
74		423	28.5582	2970	3600	630	0.690333	gray limestone	Zha5	Zhahaquan	3404.91	2.08	-5.57	0.14	0.09	0.03	0.12	0.2	0	0.09	0.25	0	0	0	0	0.06	0.02	0	0.54
75		426	28.7287	2871.12	3542.7	671.58	0.708285	light-brown silty mudstone	Zha202	Zhahaquan	3346.79	-1.27	-8.45	0.27	0.16	0.04	0.23	0.11	0	0	0	0	0	0	0	0.12	0.07	0	0.11
76		424	28.7736	2970	3600	630	0.713007	gray limestone	Zha5	Zhahaquan	3419.19	3.41	-5.13	0.07	0.07	0.02	0.08	0.1	0	0.09	0.46	0	0	0	0	0.05	0.03	0.03	0.65
77		425	28.7838	2970	3600	630	0.714084	dark-gray limestone	Zha5	Zhahaquan	3419.87	3.22	-6.66	0.1	0.08	0.02	0.1	0.15	0	0.04	0.44	0	0	0	0	0.06	0	0	0.63
78		427	28.8627	2871.12	3542.7	671.58	0.722386	light-gray muddy siltstone	Zha202	Zhahaquan	3356.26	-1.17	-9.24	0.3	0.22	0.07	0.16	0.08	0	0	0	0	0	0	0	0.14	0.03	0	0.08
79		428	29.5654	2915	3599.74	684.74	0.796361	light-brown mudstone	Zha201	Zhahaquan	3460.3	-1.58	-9.24	0.27	0.17	0.04	0.19	0.14	0	0	0	0	0	0	0	0.15	0.04	0	0.14
80	E32	301	31.8288	3071	5129.08	2058.08	0.0547945	gray silty mudstone	Shi40	Shizigou	3147.91	-1.15	-10.36	0.19	0.23	0.05	0.14	0.18	0	0	0	0.08	0	0	0	0.1	0	0.03	0.26
81		310	31.911	2703	4832.08	2129.08	0.0684932	gray limestone	Shi38	Shizigou	2794.12	0.82	-3.73	0.12	0.13	0.06	0.12	0.24	0	0.23	0	0	0	0	0	0.06	0	0.02	0.47
82		308	32.2397	2533	4581.5	2048.5	0.123288	gray silty mudstone	Shi37	Shizigou	2702.1	-2.35	-1.93	0.16	0.17	0.03	0.13	0	0	0.22	0	0	0.07	0.14	0	0.06	0	0.02	0.43
83		311	32.6507	2703	4832.08	2129.08	0.191781	gray silty mudstone	Shi38	Shizigou	3147.35	-1.23	-9.85	0.17	0.21	0.06	0.12	0.27	0	0.04	0	0	0	0	0	0.09	0	0.04	0.31
84		315	32.9795	3323	5457.08	2134.08	0.246575	gray calcareous mudstone	Shi46	Shizigou	3774.9	0.41	-6.56	0.17	0.17	0.03	0.11	0.34	0	0.06	0	0	0	0	0	0.09	0	0.02	0.4
85		302	33.0616	3071	5129.08	2058.08	0.260274	gray calcareous mudstone	Shi40	Shizigou	3583.77	0	-5.72	0.15	0.19	0.04	0.12	0.23	0	0.11	0	0.05	0	0	0	0.07	0	0.04	0.39
86		316	33.3904	2260	4187.08	1927.08	0.315068	gray calcareous mudstone	Shi1-2	Shizigou	2758.15	0.56	-2.24	0.13	0.13	0.05	0.11	0.11	0	0.32	0	0	0.03	0.03	0	0.06	0	0.03	0.49
87		318	34.1301	3110	5248.33	2138.33	0.438356	gray limestone	Shi43	Shizigou	3918.53	0.08	-4.73	0.13	0.15	0.04	0.09	0.22	0	0.26	0	0.03	0	0	0	0.05	0	0.03	0.51
88		317	34.2123	3264	5376.08	2112.08	0.452055	gray calcareous gypsum-mudstone	Shi48	Shizigou	4402.09	0.58	-5.73	0.08	0.11	-	0.08	0.2	0	0.09	0	0.39	0	0	0	0.05	0	0	0.68
89		319	34.3767	2520	4543.08	2023.08	0.479452	gray calcareous mudstone	Shi38-2	Shizigou	3503.8	-0.88	-6.4	0.21	0.23	0.04	0.19	0.12	0	0.07	0	0	0	0	0	0.1	0	0.04	0.19
90		313	34.6233	2464	4512.77	2048.77	0.520548	gray mudstone	Shi38-4	Shizigou	3729.72	-1.18	-4.26	0.22	0.32	0.07	0.16	0	0	0.09	0	0	0	0	0	0.08	0	0.05	0.09
91		312	34.6233	2464	4512.77	2048.77	0.520548	gray calcareous mudstone	Shi38-4	Shizigou	3730.12	-1.26	-1.96	0.17	0.21	0.03	0.07	0	0	0.31	0	0.18	0	0	0	0.04	0	0	0.49
92		314	34.7055	2464	4512.77	2048.77	0.534247	gray calcareous mudstone	Shi38-4	Shizigou	3744.12	-2.66	-3.64	0.12	0.18	0.06	0.1	0.12	0	0.29	0	0.05	0	0	0	0.04	0	0.03	0.46
93		320	34.8699	2856	4774.33	1918.33	0.561644	gray calcareous mudstone	Shi41-6-1	Shizigou	3862.13	-1.92	0.02	0.08	0.21	0.03	0.1	0	0.34	0	0	0	0.2	0	0	0.04	0	0	0.54
94		304	35.5274	2504	4607	2103	0.671233	gray mudstone	Shi49-1	Shizigou	3743.32	-0.82	-8.21	0.23	0.2	0.04	0.22	0.17	0	0	0	0	0	0	0	0.09	0	0.04	0.17
95		303	35.5274	2150	4530	1996.5	0.671233	gray calcareous mudstone	Shi3-1	Shizigou	4370.65	-0.95	-7.09	0.18	0.21	0.05	0.1	0.25	0	0.07	0	0.05	0	0	0	0.06	0	0.03	0.37
96		305	35.8562	2504	4607	2103	0.726027	gray gypsum-mudstone	Shi49-1	Shizigou	3849.27	-0.58	-3.58	0.07	0.12	0.02	0.12	0.16	0	0.18	0	0.26	0	0	0	0.05	0	0.01	0.6
97		306	35.9384	3100	4993.33	1893.33	0.739726	gray calcareous mudstone	Shi203	Shizigou	4492.2	-1.99	-7.68	0.16	0.31	0.04	0.13	0.18	0	0.04	0	0.04	0	0	0	0.06	0	0.04	0.26
98		307	35.9384	2460	4469.33	2009.33	0.739726	gray gypsum-mudstone	Shi49	Shizigou	3545.49	-0.75	-2.19	0.09	0.09	0.01	0.09	0.07	0	0.27	0	0.3	0	0	0	0.05	0	0.01	0.64
99	E31	202	40.0549	3522	3816	294	0.405544	gray limestone	Hong119	Hongliuquan	3641.23	-2.4	-7.4	0.15	0.11	0.02	0.16	0.49	0	0.03	0	0	0	0	0	0.05	0	0	0.52
100		203	40.1035	1813	2062	249	0.413253	light-brown muddy siltstone	Qie123	Qiekelike	1915.9	-3.09	-12.23	0.49	0.18	0.03	0.17	0.06	0	0	0	0	0	0	0	0.07	0	0	0.06
101		204	40.1174	1813	2062	249	0.415462	light-brown silty mudstone	Qie123	Qiekelike	1916.45	-5.88	-11.98	0.44	0.16	0.03	0.17	0.13	0	0	0	0	0	0	0	0.07	0	0	0.13
102		205	41.0773	1836	2094	258	0.567829	light-brown silty mudstone	Qie126	Qiekelike	1994.8	-2.92	-12.97	0.38	0.17	0.03	0.18	0.14	0	0	0	0	0	0	0.01	0.08	0	0	0.14
103		207	42.3801	1836	2094	258	0.774612	light-brown mudstone	Qie126	Qiekelike	2035.85	-3.85	-11.93	0.37	0.22	0.06	0.14	0.1	0	0	0	0	0	0	0.02	0.09	0	0	0.1
104		208	42.6975	1836	2094	258	0.825	light-brown siltstone	Qie126	Qiekelike	2048.85	-5.84	-13.22	0.31	0.26	0.05	0.11	0.21	0	0	0	0	0	0	0.01	0.05	0	0	0.21
105		210	43.0628	1715	1956	241	0.882988	light-brown coarse sandstone	Qie122	Qiekelike	1927.8	-3.4	-11.12	0.32	0.16	0.05	0.1	0.28	0	0	0	0	0	0	0	0.09	0	0	0.28
106		209	43.0718	1836	2094	258	0.884419	light-gray coarse sandstone	Qie126	Qiekelike	2064.18	-4.09	-14.43	0.4	0.27	0.09	0.1	0.11	0	0	0	0	0	0	0	0.05	0	0	0.11
107		211	43.2902	1715	1956	241	0.919087	light-brown medium sandstone	Qie122	Qiekelike	1936.5	-4.75	-14.65	0.36	0.43	0.06	0.07	0.05	0	0	0	0	0	0	0	0.03	0	0	0.05
108		212	43.4602	1715	1956	241	0.946058	light-brown granule conglomerate	Qie122	Qiekelike	1943	-4.34	-12.27	0.43	0.29	0.07	0.08	0.1	0	0	0	0	0	0	0	0.02	0	0	0.1
109		213	43.5667	1058	1499.5	441.5	0.962967	gray silty mudstone	Qie8	Qiekelike	1483.15	-1.92	-11.82	0.34	0.14	0.03	0.28	0.07	0	0	0	0	0	0	0	0.13	0	0	0.07
		Formation	age of top(Ma)	age of bottom(Ma)	time interval
		N22	8.2	14.9	6.7
		N21	14.9	22	7.1
		N1	22	31.5	9.5
		E32	31.5	37.5	6
		E31	37.5	43.8	6.3

## Sheet: 岩心柱状图（补充）
		年龄	百分制方解石	百分制白云石			年龄	蒸发盐类
		8.81756	1	1			8.81756	0
		8.82595	1	1			8.82595	0
		9.28811	1	1			9.28811	0.03
		9.32019	1	1			9.32019	0.03
		10.7017	1	1			10.7017	0
		10.9434	1	1			10.9434	0.03
		10.9695	1	1			10.9695	0
		10.9929	0.5625	1			10.9929	0.03
		11.4163	1	1			11.4163	0.02
		11.4665	1	1			11.4665	0.03
		11.4844	1	1			11.4844	0
		11.5975	0.708333	1			11.5975	0.03
		11.6446	1	1			11.6446	0
		11.6505	0.724138	1			11.6505	0.03
		11.7638	0.294118	1			11.7638	0.03
		11.7772	0.205882	1			11.7772	0
		11.7978	1	1			11.7978	0
		11.8733	1	1			11.8733	0.04
		12.2166	1	1			12.2166	0
		12.322	0.62069	1			12.322	0.02
		12.4293	0.8	1			12.4293	0
		12.4504	1	1			12.4504	0
		12.5719	0.9	1			12.5719	0.03
		12.5842	1	1			12.5842	0
		13.5201	1	1			13.5201	0
		13.8235	1	1			13.8235	0
		14.557	1	1			14.557	0
		14.766	1	1			14.766	0.04
		14.7672	1	1			14.7672	0
		16.0833	1	1			16.0833	0
		16.4778	1	1			16.4778	0
		16.4778	1	1			16.4778	0
		16.8722	1	1			16.8722	0
		17.2667	1	1			17.2667	0
		17.6611	1	1			17.6611	0
		18.0556	1	1			18.0556	0
		18.0556	1	1			18.0556	0
		18.45	1	1			18.45	0
		18.45	1	1			18.45	0
		18.8444	1	1			18.8444	0
		19.2389	1	1			19.2389	0
		19.6333	1	1			19.6333	0
		19.6333	1	1			19.6333	0
		20.4222	1	1			20.4222	0
		20.8167	1	1			20.8167	0
		20.8167	0.8125	1			20.8167	0
		21.2111	1	1			21.2111	0
		21.5529	1	1			21.5529	0
		21.6641	0.592593	1			21.6641	0
		21.6776	0.673077	1			21.6776	0
		21.7314	0.886792	1			21.7314	0
		22.4805	1	1			22.4805	0
		23.5468	1	1			23.5468	0
		23.5758	1	1			23.5758	0
		23.6667	1	1			23.6667	0
		23.6857	1	1			23.6857	0
		23.8052	1	1			23.8052	0
		23.8318	1	1			23.8318	0
		23.8811	0.860465	1			23.8811	0
		24.909	1	1			24.909	0
		25.1905	0.736842	1			25.1905	0
		25.4082	1	1			25.4082	0
		25.9145	1	1			25.9145	0
		25.9184	1	1			25.9184	0
		26.1034	1	1			26.1034	0
		26.953	1	1			26.953	0
		27.0233	1	1			27.0233	0
		27.1368	0.48	1			27.1368	0
		27.1613	1	1			27.1613	0
		27.4225	0.75	1			27.4225	0
		27.4988	0.875	1			27.4988	0
		27.5014	1	1			27.5014	0
		27.606	1	1			27.606	0
		28.5582	0.833333	1			28.5582	0
		28.7287	1	1			28.7287	0
		28.7736	0.861538	1			28.7736	0
		28.7838	0.936508	1			28.7838	0
		28.8627	1	1			28.8627	0
		29.5654	1	1			29.5654	0
		31.8288	1	1			31.8288	0.08
		31.911	0.510638	1			31.911	0
		32.2397	0	1			32.2397	0.21
		32.6507	0.870968	1			32.6507	0
		32.9795	0.85	1			32.9795	0
		33.0616	0.676471	1			33.0616	0.05
		33.3904	0.255814	1			33.3904	0.06
		34.1301	0.458333	1			34.1301	0.03
		34.2123	0.689655	1			34.2123	0.39
		34.3767	0.631579	1			34.3767	0
		34.6233	0	1			34.6233	0
		34.6233	0	1			34.6233	0.18
		34.7055	0.292683	1			34.7055	0.05
		34.8699	0	1			34.8699	0.2
		35.5274	1	1			35.5274	0
		35.5274	0.78125	1			35.5274	0.05
		35.8562	0.470588	1			35.8562	0.26
		35.9384	0.818182	1			35.9384	0.04
		35.9384	0.205882	1			35.9384	0.3
		39.4717	0	1			39.4717	0
		40.0549	0.942308	1			40.0549	0
		40.1035	1	1			40.1035	0
		40.1174	1	1			40.1174	0
		41.0773	1	1			41.0773	0
		41.3777	0	1			41.3777	0
		42.3801	1	1			42.3801	0
		42.6975	1	1			42.6975	0
		43.0628	1	1			43.0628	0
		43.0718	1	1			43.0718	0
		43.2902	1	1			43.2902	0
		43.4602	1	1			43.4602	0
		43.5667	1	1			43.5667	0

## Sheet: 无隐藏表格
样品名称		石英	斜长石	微斜长石	碎屑颗粒	绿泥石	云母	方沸石	粘土	方解石	白云石	铁白云石	文石	碳酸盐	硬石膏	钙芒硝	硫酸盐	石盐	赤铁矿	黄铁矿	砂/泥		碎屑矿物
201	泥岩	0.31	0.16	0.05	0.52	0.08	0.38	-	0.46	-	-	-	-	0	-	-	0	-	0.02	-	1.13043
202	泥质粉砂岩	0.15	0.11	0.02	0.28	0.05	0.16	-	0.21	0.49	-	0.03	-	0.52	-	-	0	-	-	-	1.33333
203	泥质粉砂岩	0.49	0.18	0.03	0.7	0.07	0.17	-	0.24	0.06	-	-	-	0.06	-	-	0	-	-	-	2.91667
204	粉砂质泥岩	0.44	0.16	0.03	0.63	0.07	0.17	-	0.24	0.13	-	-	-	0.13	-	-	0	-	-	-	2.625
205	粉砂质泥岩	0.38	0.17	0.03	0.58	0.08	0.18	-	0.26	0.14	-	-	-	0.14	-	-	0	-	0.01	-	2.23077
206	粗砂岩	0.59	0.23	0.06	0.88	0.04	0.09	-	0.13	-	-	-	-	0	-	-	0	-	-	-	6.76923
207	砂岩	0.37	0.22	0.06	0.65	0.09	0.14	-	0.23	0.1	-	-	-	0.1	-	-	0	-	0.02	-	2.82609
208	细砂岩	0.31	0.26	0.05	0.62	0.05	0.11	-	0.16	0.21	-	-	-	0.21	-	-	0	-	0.01	-	3.875
209	细砾岩	0.4	0.27	0.09	0.76	0.05	0.1	-	0.15	0.11	-	-	-	0.11	-	-	0	-	-	-	5.06667
210	砂岩	0.32	0.16	0.05	0.53	0.09	0.1	-	0.19	0.28	-	-	-	0.28	-	-	0	-	-	-	2.78947
211	细砾岩	0.36	0.43	0.06	0.85	0.03	0.07	-	0.1	0.05	-	-	-	0.05	-	-	0	-	-	-	8.5
212	细砾岩	0.43	0.29	0.07	0.79	0.02	0.08	-	0.1	0.1	-	-	-	0.1	-	-	0	-	-	-	7.9
213	灰质泥岩	0.34	0.14	0.03	0.51	0.13	0.28	-	0.41	0.07	-	-	-	0.07	-	-	0	-	-	-	1.2439
310	灰质泥岩	0.12	0.13	0.06	0.31	0.06	0.12	-	0.18	0.24	-	0.23	-	0.47	-	-	0	-	-	0.02	1.72222
301	灰质泥岩	0.19	0.23	0.05	0.47	0.1	0.14	-	0.24	0.18	-	-	-	0.18	0.08	-	0.08	-	-	0.03	1.95833
308	膏质含灰泥岩	0.16	0.17	0.03	0.36	0.06	0.13	-	0.19	-	-	0.22	-	0.22	-	0.07	0.07	0.14	-	0.02	1.89474
311	泥岩	0.17	0.21	0.06	0.44	0.09	0.12	-	0.21	0.27	-	0.04	-	0.31	-	-	0	-	-	0.04	2.09524
315	灰质泥岩	0.17	0.17	0.03	0.37	0.09	0.11	-	0.2	0.34	-	0.06	-	0.4	-	-	0	-	-	0.02	1.85
302	灰质泥岩	0.15	0.19	0.04	0.38	0.07	0.12	-	0.19	0.23	-	0.11	-	0.34	0.05	-	0.05	-	-	0.04	2
316	泥灰岩	0.13	0.13	0.05	0.31	0.06	0.11	-	0.17	0.11	-	0.32	-	0.43	-	0.03	0.03	0.03	-	0.03	1.82353
319	泥岩-云岩	0.21	0.23	0.04	0.48	0.1	0.19	-	0.29	0.12	-	0.07	-	0.19	-	-	0	-	-	0.04	1.65517
313	泥灰岩	0.22	0.32	0.07	0.61	0.08	0.16	-	0.24	-	-	0.09	-	0.09	-	-	0	-	-	0.05	2.54167
312	膏质泥岩	0.17	0.21	0.03	0.41	0.04	0.07	-	0.11	-	-	0.31	-	0.31	0.18	-	0.18	-	-	-	3.72727
314	灰质泥岩	0.12	0.18	0.06	0.36	0.04	0.1	-	0.14	0.12	-	0.29	-	0.41	0.05	-	0.05	-	-	0.03	2.57143
320	白云岩	0.08	0.21	0.03	0.32	0.04	0.1	-	0.14	-	0.34	-	-	0.34	-	0.2	0.2	-	-	-	2.28571
317	灰-膏质泥岩	0.08	0.11	-	0.19	0.05	0.08	-	0.13	0.2	-	0.09	-	0.29	0.39	-	0.39	-	-	-	1.46154
318	膏质泥岩	0.13	0.15	0.04	0.32	0.05	0.09	-	0.14	0.22	-	0.26	-	0.48	0.03	-	0.03	-	-	0.03	2.28571
304	泥质灰岩	0.23	0.2	0.04	0.47	0.09	0.22	-	0.31	0.17	-	-	-	0.17	-	-	0	-	-	0.04	1.51613
303	泥灰岩	0.18	0.21	0.05	0.44	0.06	0.1	-	0.16	0.25	-	0.07	-	0.32	0.05	-	0.05	-	-	0.03	2.75
306	灰质泥岩	0.16	0.31	0.04	0.51	0.06	0.13	-	0.19	0.18	-	0.04	-	0.22	0.04	-	0.04	-	-	0.04	2.68421
307	含泥云灰岩	0.09	0.09	0.01	0.19	0.05	0.09	-	0.14	0.07	-	0.27	-	0.34	0.3	-	0.3	-	-	0.01	1.35714
305	膏质泥岩	0.07	0.12	0.02	0.21	0.05	0.12	-	0.17	0.16	-	0.18	-	0.34	0.26	-	0.26	-	-	0.01	1.23529
402	泥岩	0.27	0.15	0.04	0.46	0.12	0.14	-	0.26	0.28	-	-	-	0.28	-	-	0	-	-	-	1.76923
403	粉砂岩	0.38	0.28	0.07	0.73	0.08	0.09	-	0.17	0.09	-	-	-	0.09	-	-	0	-	-	-	4.29412
404	泥质粉砂岩	0.32	0.28	0.09	0.69	0.08	0.09	-	0.17	0.15	-	-	-	0.15	-	-	0	-	-	-	4.05882
405	细砂岩	0.36	0.35	0.05	0.76	0.05	0.06	0.03	0.14	0.09	-	-	-	0.09	-	-	0	-	-	-	5.42857
407	砂质泥岩	0.35	0.19	0.06	0.6	0.11	0.16	0.06	0.33	0.07	-	-	-	0.07	-	-	0	-	-	-	1.81818
406	粉砂质泥岩	0.17	0.12	0.03	0.32	0.07	0.2	-	0.27	0.41	-	-	-	0.41	-	-	0	-	-	-	1.18519
408	泥质粉砂岩	0.21	0.12	0.04	0.37	0.15	0.35	0.04	0.54	0.09	-	-	-	0.09	-	-	0	-	-	-	0.685185
411	粉砂岩	0.2	0.13	0.03	0.36	0.05	0.11	0.04	0.2	0.37	-	0.06	-	0.43	-	-	0	-	-	-	1.8
409	粉砂岩	0.33	0.27	0.07	0.67	0.12	0.11	0.03	0.26	0.07	-	-	-	0.07	-	-	0	-	-	-	2.57692
418	粉砂质泥岩	0.29	0.15	0.05	0.49	0.11	0.22	0.07	0.4	0.09	-	-	-	0.09	-	-	0	-	-	0.03	1.225
412	泥岩	0.3	0.22	0.06	0.58	0.08	0.12	0.08	0.28	0.11	-	-	-	0.11	-	-	0	-	-	0.03	2.07143
414	泥岩	0.3	0.18	0.05	0.53	0.1	0.13	0.05	0.28	0.17	-	-	-	0.17	-	-	0	-	-	0.02	1.89286
415	泥岩	0.26	0.2	0.04	0.5	0.07	0.11	0.04	0.22	0.26	-	-	-	0.26	-	-	0	-	-	0.02	2.27273
410	砂质泥岩	0.33	0.24	0.04	0.61	0.08	0.1	0.02	0.2	0.14	-	0.05	-	0.19	-	-	0	-	-	-	3.05
417	泥灰岩	0.35	0.25	0.06	0.66	0.07	0.08	0.03	0.18	0.15	-	-	-	0.15	-	-	0	-	-	0.01	3.66667
429	细砂岩	0.17	0.09	0.04	0.3	0.08	0.1	-	0.18	0.24	-	0.26	-	0.5	-	-	0	-	-	0.02	1.66667
416	砂质泥岩	0.34	0.19	0.05	0.58	0.1	0.14	0.05	0.29	0.12	-	-	-	0.12	-	-	0	-	-	0.01	2
419	粉砂岩	0.16	0.09	0.03	0.28	0.08	0.13	0.04	0.25	0.33	-	0.11	-	0.44	-	-	0	-	-	0.03	1.12
421	粉砂岩	0.28	0.14	0.05	0.47	0.16	0.19	-	0.35	0.18	-	-	-	0.18	-	-	0	-	-	-	1.34286
420	粉砂质泥岩	0.2	0.13	0.04	0.37	0.09	0.19	-	0.28	0.28	-	0.04	-	0.32	-	-	0	-	-	0.02	1.32143
413	粉砂岩	0.34	0.26	0.06	0.66	0.1	0.13	0.03	0.26	0.09	-	-	-	0.09	-	-	0	-	-	-	2.53846
422	粉砂岩	0.34	0.25	0.05	0.64	0.08	0.08	0.03	0.19	0.17	-	-	-	0.17	-	-	0	-	-	0.01	3.36842
428	泥岩	0.27	0.17	0.04	0.48	0.15	0.19	0.04	0.38	0.14	-	-	-	0.14	-	-	0	-	-	-	1.26316
423	泥岩	0.14	0.09	0.03	0.26	0.06	0.12	0.02	0.2	0.2	-	0.09	0.25	0.54	-	-	0	-	-	-	1.3
426	泥岩	0.27	0.16	0.04	0.47	0.12	0.23	0.07	0.42	0.11	-	-	-	0.11	-	-	0	-	-	-	1.11905
427	粉砂岩	0.3	0.22	0.07	0.59	0.14	0.16	0.03	0.33	0.08	-	-	-	0.08	-	-	0	-	-	-	1.78788
424	粉砂质泥岩	0.07	0.07	0.02	0.16	0.05	0.08	0.03	0.16	0.1	-	0.09	0.46	0.65	-	-	0	-	-	0.03	1
425	泥岩	0.1	0.08	0.02	0.2	0.06	0.1	-	0.16	0.15	-	0.04	0.44	0.63	-	-	0	-	-	-	1.25
516	泥岩	0.3	0.16	0.05	0.51	0.14	0.23	-	0.37	0.08	-	--	-	0.08	-	-	0	0.04	-	-	1.37838
502	泥岩	0.25	0.1	0.04	0.39	0.13	0.2	-	0.33	0.26	-	-	-	0.26	-	-	0	-	0.02	-	1.18182
514	泥质粉砂岩	0.33	0.18	0.05	0.56	0.16	0.15	-	0.31	0.13	-	-	-	0.13	-	-	0	-	-	-	1.80645
501	泥岩	0.26	0.15	0.05	0.46	0.17	0.23	-	0.4	0.13	-	-	-	0.13	-	-	0	-	0.02	-	1.15
508	泥质粉砂岩	0.33	0.19	0.06	0.58	0.17	0.11	-	0.28	0.13	-	-	-	0.13	-	-	0	-	-	-	2.07143
509	泥质粉砂岩	0.32	0.28	0.08	0.68	0.08	0.08	-	0.16	0.16	-	-	-	0.16	-	-	0	-	-	-	4.25
517	灰质泥岩	0.35	0.18	0.08	0.61	0.13	0.15	-	0.28	0.11	-	-	-	0.11	-	-	0	-	-	-	2.17857
510	粉砂岩	0.35	0.21	0.09	0.65	0.1	0.08	-	0.18	0.18	-	-	-	0.18	-	-	0	-	-	-	3.61111
513	泥岩	0.31	0.19	0.06	0.56	0.16	0.16	-	0.32	0.12	-	-	-	0.12	-	-	0	-	-	-	1.75
511	泥质粉砂岩	0.34	0.23	0.07	0.64	0.1	0.08	-	0.18	0.17	-	-	-	0.17	-	-	0	-	-	-	3.55556
512	砂岩	0.4	0.27	0.07	0.74	0.06	0.06	-	0.12	0.14	-	-	-	0.14	-	-	0	-	-	-	6.16667
503	泥岩	0.33	0.22	0.05	0.6	0.17	0.13	-	0.3	0.09	-	-	-	0.09	-	-	0	-	-	-	2
504	泥岩	0.29	0.15	0.04	0.48	0.15	0.22	-	0.37	0.13	-	-	-	0.13	-	-	0	-	0.02	-	1.2973
505	灰质泥岩	0.35	0.18	0.05	0.58	0.14	0.17	-	0.31	0.11	-	-	-	0.11	-	-	0	-	-	-	1.87097
518	砂质泥岩	0.33	0.2	0.07	0.6	0.06	0.07	-	0.13	0.25	-	-	-	0.25	-	-	0	-	0.01	-	4.61538
519	粉砂质泥岩	0.35	0.19	0.04	0.58	0.12	0.18	-	0.3	0.11	-	-	-	0.11	-	-	0	-	-	-	1.93333
506	灰质泥岩	0.24	0.13	0.05	0.42	0.09	0.18	-	0.27	0.29	-	-	-	0.29	-	-	0	-	-	0.03	1.55556
515	灰质泥岩	0.21	0.13	0.03	0.37	0.09	0.17	0.03	0.29	0.26	-	0.06	-	0.32	-	-	0	-	-	0.03	1.27586
507	泥质粉砂岩	0.3	0.19	0.03	0.52	0.1	0.11	-	0.21	0.27	-	-	-	0.27	-	-	0	-	-	-	2.47619
520	泥岩	0.2	0.12	0.04	0.36	0.12	0.25	-	0.37	0.27	-	-	-	0.27	-	-	0	-	-	-	0.972973
521	泥岩	0.29	0.16	0.03	0.48	0.1	0.12	0.03	0.25	0.16	-	0.11	-	0.27	-	-	0	-	-	-	1.92
522	泥岩	0.15	0.07	0.03	0.25	0.08	0.15	-	0.23	0.27	-	0.06	0.2	0.53	-	-	0	-	-	-	1.08696
523	粉砂岩	0.12	0.09	0.04	0.25	0.07	0.16	-	0.23	0.17	-	0.17	0.18	0.52	-	-	0	-	-	-	1.08696
601	粉砂质泥岩	0.18	0.1	0.04	0.32	0.11	0.16	0.04	0.31	0.12	-	-	0.22	0.34	-	-	0	0.03	-	-	1.03226
602	泥岩	0.25	0.12	0.06	0.43	0.12	0.21	0.03	0.36	0.18	-	-	-	0.18	-	-	0	0.03	-	-	1.19444
603	灰质泥岩	0.22	0.13	0.04	0.39	0.11	0.18	-	0.29	0.29	-	-	-	0.29	-	-	0	0.02	-	0.02	1.34483
604	灰质泥岩	0.23	0.13	0.04	0.4	0.09	0.16	-	0.25	0.09	-	0.08	0.12	0.29	-	-	0	0.03	-	0.04	1.6
605	灰质泥岩	0.27	0.14	0.04	0.45	0.13	0.27	-	0.4	0.08	-	-	-	0.08	-	-	0	0.04	-	0.03	1.125
606	灰质泥岩	0.21	0.11	0.04	0.36	0.09	0.25	-	0.34	0.17	-	0.07	-	0.24	-	-	0	0.03	-	0.04	1.05882
607	灰质泥岩	0.18	0.14	0.03	0.35	0.09	0.18	-	0.27	0.1	-	0.24	-	0.34	-	-	0	0.03	-	0.02	1.2963
608	灰质泥岩	0.21	0.11	0.04	0.36	0.11	0.14	0.04	0.29	0.18	-	0.11	-	0.29	-	-	0	0.02	-	0.03	1.24138
609	泥灰岩	0.26	0.12	0.04	0.42	0.11	0.19	0.05	0.35	0.18	-	-	-	0.18	-	-	0	0.03	-	0.02	1.2
610	泥岩	0.17	0.1	0.03	0.3	0.07	0.24	-	0.31	0.18	-	0.14	-	0.32	-	-	0	0.03	-	0.04	0.967742
611-1	泥灰岩	0.25	0.13	0.03	0.41	0.13	0.17	0.03	0.33	0.21	-	-	-	0.21	-	-	0	0.03	-	0.02	1.24242
611	灰质泥岩	0.27	0.12	0.04	0.43	0.14	0.19	-	0.33	0.22	-	-	-	0.22	-	-	0	-	-	0.01	1.30303
612	灰质泥岩	0.28	0.14	0.03	0.45	0.13	0.17	0.02	0.32	0.21	-	-	-	0.21	-	-	0	-	-	0.02	1.40625
613	灰质泥岩	0.18	0.1	0.04	0.32	0.09	0.21	-	0.3	0.07	-	0.27	-	0.34	-	-	0	-	-	0.04	1.06667
614	钙质泥岩	0.24	0.09	0.07	0.4	0.1	0.19	0.04	0.33	0.2	-	0.05	-	0.25	-	-	0	-	-	0.03	1.21212
615	灰质泥岩	0.16	0.08	0.03	0.27	0.07	0.18	0.03	0.28	0.36	-	0.04	-	0.4	-	-	0	0.03	-	0.02	0.964286
616	砂岩	0.34	0.18	0.06	0.58	0.16	0.14	-	0.3	0.11	-	-	-	0.11	-	-	0	-	-	-	1.93333
624	泥质粉砂岩	0.29	0.17	0.06	0.52	0.15	0.24	-	0.39	0.09	-	-	-	0.09	-	-	0	-	-	-	1.33333
621	泥质粉砂岩	0.3	0.17	0.07	0.54	0.07	0.07	-	0.14	0.32	-	-	-	0.32	-	-	0	-	-	0.01	3.85714
625	泥质粉砂岩	0.4	0.15	0.06	0.61	0.12	0.17	-	0.29	0.09	-	-	-	0.09	-	-	0	-	-	-	2.10345
622	泥质粉砂岩	0.25	0.17	0.08	0.5	0.08	0.12	-	0.2	0.3	-	-	-	0.3	-	-	0	-	-	-	2.5
618	泥质粉砂岩	0.39	0.2	0.08	0.67	0.06	0.09	-	0.15	0.17	-	-	-	0.17	-	-	0	-	-	0.01	4.46667
623	泥质粉砂岩	0.3	0.12	0.05	0.47	0.1	0.12	-	0.22	0.31	-	-	-	0.31	-	-	0	-	-	0.01	2.13636
617	粉砂质泥岩	0.33	0.16	0.04	0.53	0.11	0.23	-	0.34	0.11	-	-	-	0.11	-	-	0	-	-	0.01	1.55882
627	钙质粉砂岩	0.36	0.22	0.07	0.65	0.1	0.14	-	0.24	0.1	-	-	-	0.1	-	-	0	-	-	0.01	2.70833
626	细砂岩-泥岩	0.34	0.26	0.06	0.66	0.06	0.12	-	0.18	0.16	-	-	-	0.16	-	-	0	-	-	-	3.66667
619	泥岩-粉砂岩	0.32	0.23	0.05	0.6	0.14	0.13	-	0.27	0.12	-	-	-	0.12	-	-	0	-	--	-	2.22222
620	粉砂质泥岩	0.36	0.17	0.05	0.58	0.14	0.18	-	0.32	0.09	-	-	-	0.09	-	-	0	-	-	0.02	1.8125

## Sheet: 小数化表格
顶深	底深	深度	样品名称	岩性	碎屑颗粒	粘土	总黏土	碳酸盐	总碳酸盐	硫酸盐	石盐	总盐类矿物	总铁矿类	赤铁矿	黄铁矿	砂/泥	深度
0	17.85	8.925	601	粉砂质泥岩	0.32	0.31	0.63	0.34	0.97	0	0.03	1	1	0	0	1.03226	8.925
17.85	35.7	26.775	602	泥岩	0.43	0.36	0.79	0.18	0.97	0	0.03	1	1	0	0	1.19444	26.775
35.7	53.55	44.625	603	灰质泥岩	0.39	0.29	0.68	0.29	0.97	0	0.02	0.99	1	0	0.02	1.34483	44.625
53.55	89.25	71.4	604	灰质泥岩	0.4	0.25	0.65	0.29	0.94	0	0.03	0.97	1	0	0.04	1.6	71.4
89.25	107.107	98.1786	605	灰质泥岩	0.45	0.4	0.85	0.08	0.93	0	0.04	0.97	1	0	0.03	1.125	98.1786
107.107	124.964	116.036	606	灰质泥岩	0.36	0.34	0.7	0.24	0.94	0	0.03	0.97	1	0	0.04	1.05882	116.036
124.964	142.821	133.893	607	灰质泥岩	0.35	0.27	0.62	0.34	0.96	0	0.03	0.99	1	0	0.02	1.2963	133.893
142.821	160.678	151.75	608	灰质泥岩	0.36	0.29	0.65	0.29	0.94	0	0.02	0.96	1	0	0.03	1.24138	151.75
160.678	178.536	169.607	609	泥灰岩	0.42	0.35	0.77	0.18	0.95	0	0.03	0.98	1	0	0.02	1.2	169.607
178.536	196.393	187.464	610	泥岩	0.3	0.31	0.61	0.32	0.93	0	0.03	0.96	1	0	0.04	0.967742	187.464
196.393	214.25	205.321	611-1	泥灰岩	0.41	0.33	0.74	0.21	0.95	0	0.03	0.98	1	0	0.02	1.24242	205.321
214.25	232.107	223.178	611	灰质泥岩	0.43	0.33	0.76	0.22	0.98	0	0	0.98	1	0	0.01	1.30303	223.178
232.107	249.964	241.035	612	灰质泥岩	0.45	0.32	0.77	0.21	0.98	0	0	0.98	1	0	0.02	1.40625	241.035
249.964	267.821	258.892	613	灰质泥岩	0.32	0.3	0.62	0.34	0.96	0	0	0.96	1	0	0.04	1.06667	258.892
267.821	285.678	276.75	614	钙质泥岩	0.4	0.33	0.73	0.25	0.98	0	0	0.98	1	0	0.03	1.21212	276.75
285.678	303.535	294.607	615	灰质泥岩	0.27	0.28	0.55	0.4	0.95	0	0.03	0.98	1	0	0.02	0.964286	294.607
303.535	321.392	312.464	616	砂岩	0.58	0.3	0.88	0.11	0.99	0	0	0.99	1	0	0	1.93333	312.464
321.392	339.249	330.321	624	泥质粉砂岩	0.52	0.39	0.91	0.09	1	0	0	1	1	0	0	1.33333	330.321
339.249	357.107	348.178	621	泥质粉砂岩	0.54	0.14	0.68	0.32	1	0	0	1	1	0	0.01	3.85714	348.178
357.107	374.964	366.035	625	泥质粉砂岩	0.61	0.29	0.9	0.09	0.99	0	0	0.99	1	0	0	2.10345	366.035
374.964	392.821	383.892	622	泥质粉砂岩	0.5	0.2	0.7	0.3	1	0	0	1	1	0	0	2.5	383.892
392.821	410.678	401.749	618	泥质粉砂岩	0.67	0.15	0.82	0.17	0.99	0	0	0.99	1	0	0.01	4.46667	401.749
410.678	428.535	419.606	623	泥质粉砂岩	0.47	0.22	0.69	0.31	1	0	0	1	1	0	0.01	2.13636	419.606
428.535	446.392	437.463	617	粉砂质泥岩	0.53	0.34	0.87	0.11	0.98	0	0	0.98	1	0	0.01	1.55882	437.463
446.392	464.249	455.321	627	钙质粉砂岩	0.65	0.24	0.89	0.1	0.99	0	0	0.99	1	0	0.01	2.70833	455.321
464.249	482.106	473.178	626	细砂岩-泥岩	0.66	0.18	0.84	0.16	1	0	0	1	1	0	0	3.66667	473.178
482.106	499.963	491.035	619	泥岩-粉砂岩	0.6	0.27	0.87	0.12	0.99	0	0	0.99	1	0	0	2.22222	491.035
499.963	517.813	508.888	620	粉砂质泥岩	0.58	0.32	0.9	0.09	0.99	0	0	0.99	1	0	0.02	1.8125	508.888
517.813	561.283	539.548	516	泥岩	0.51	0.37	0.88	0.08	0.96	0	0.04	1	1	0	0	1.37838	539.548
561.283	604.753	583.018	502	泥岩	0.39	0.33	0.72	0.26	0.98	0	0	0.98	1	0.02	0	1.18182	583.018
604.753	648.223	626.488	514	泥质粉砂岩	0.56	0.31	0.87	0.13	1	0	0	1	1	0	0	1.80645	626.488
648.223	691.693	669.958	501	泥岩	0.46	0.4	0.86	0.13	0.99	0	0	0.99	1	0.02	0	1.15	669.958
691.693	735.163	713.428	508	泥质粉砂岩	0.58	0.28	0.86	0.13	0.99	0	0	0.99	1	0	0	2.07143	713.428
735.163	778.633	756.898	509	泥质粉砂岩	0.68	0.16	0.84	0.16	1	0	0	1	1	0	0	4.25	756.898
778.633	822.103	800.368	517	灰质泥岩	0.61	0.28	0.89	0.11	1	0	0	1	1	0	0	2.17857	800.368
822.103	865.573	843.838	510	粉砂岩	0.65	0.18	0.83	0.18	1.01	0	0	1.01	1	0	0	3.61111	843.838
865.573	909.043	887.308	513	泥岩	0.56	0.32	0.88	0.12	1	0	0	1	1	0	0	1.75	887.308
909.043	952.513	930.778	511	泥质粉砂岩	0.64	0.18	0.82	0.17	0.99	0	0	0.99	1	0	0	3.55556	930.778
952.513	995.983	974.248	512	砂岩	0.74	0.12	0.86	0.14	1	0	0	1	1	0	0	6.16667	974.248
995.983	1039.45	1017.72	503	泥岩	0.6	0.3	0.9	0.09	0.99	0	0	0.99	1	0	0	2	1017.72
1039.45	1082.92	1061.19	504	泥岩	0.48	0.37	0.85	0.13	0.98	0	0	0.98	1	0.02	0	1.2973	1061.19
1082.92	1126.39	1104.66	505	灰质泥岩	0.58	0.31	0.89	0.11	1	0	0	1	1	0	0	1.87097	1104.66
1126.39	1169.86	1148.13	518	砂质泥岩	0.6	0.13	0.73	0.25	0.98	0	0	0.98	1	0.01	0	4.61538	1148.13
1169.86	1213.33	1191.6	519	粉砂质泥岩	0.58	0.3	0.88	0.11	0.99	0	0	0.99	1	0	0	1.93333	1191.6
1213.33	1256.8	1235.07	506	灰质泥岩	0.42	0.27	0.69	0.29	0.98	0	0	0.98	1	0	0.03	1.55556	1235.07
1256.8	1300.27	1278.54	515	灰质泥岩	0.37	0.29	0.66	0.32	0.98	0	0	0.98	1	0	0.03	1.27586	1278.54
1300.27	1343.74	1322.01	507	泥质粉砂岩	0.52	0.21	0.73	0.27	1	0	0	1	1	0	0	2.47619	1322.01
1343.74	1387.21	1365.48	520	泥岩	0.36	0.37	0.73	0.27	1	0	0	1	1	0	0	0.972973	1365.48
1387.21	1430.68	1408.95	521	泥岩	0.48	0.25	0.73	0.27	1	0	0	1	1	0	0	1.92	1408.95
1430.68	1474.15	1452.42	522	泥岩	0.25	0.23	0.48	0.53	1.01	0	0	1.01	1	0	0	1.08696	1452.42
1474.15	1517.62	1495.89	523	粉砂岩	0.25	0.23	0.48	0.52	1	0	0	1	1	0	0	1.08696	1495.89
1517.62	1546.19	1531.91	402	泥岩	0.46	0.26	0.72	0.28	1	0	0	1	1	0	0	1.76923	1531.91
1546.19	1574.76	1560.48	403	粉砂岩	0.73	0.17	0.9	0.09	0.99	0	0	0.99	1	0	0	4.29412	1560.48
1574.76	1603.33	1589.05	404	泥质粉砂岩	0.69	0.17	0.86	0.15	1.01	0	0	1.01	1	0	0	4.05882	1589.05
1603.33	1631.9	1617.62	405	细砂岩	0.76	0.14	0.9	0.09	0.99	0	0	0.99	1	0	0	5.42857	1617.62
1631.9	1660.47	1646.19	407	砂质泥岩	0.6	0.33	0.93	0.07	1	0	0	1	1	0	0	1.81818	1646.19
1660.47	1689.04	1674.76	406	粉砂质泥岩	0.32	0.27	0.59	0.41	1	0	0	1	1	0	0	1.18519	1674.76
1689.04	1717.61	1703.33	408	泥质粉砂岩	0.37	0.54	0.91	0.09	1	0	0	1	1	0	0	0.685185	1703.33
1717.61	1746.18	1731.9	411	粉砂岩	0.36	0.2	0.56	0.43	0.99	0	0	0.99	1	0	0	1.8	1731.9
1746.18	1774.75	1760.47	409	粉砂岩	0.67	0.26	0.93	0.07	1	0	0	1	1	0	0	2.57692	1760.47
1774.75	1803.32	1789.04	418	粉砂质泥岩	0.49	0.4	0.89	0.09	0.98	0	0	0.98	1	0	0.03	1.225	1789.04
1803.32	1831.89	1817.61	412	泥岩	0.58	0.28	0.86	0.11	0.97	0	0	0.97	1	0	0.03	2.07143	1817.61
1831.89	1860.46	1846.18	414	泥岩	0.53	0.28	0.81	0.17	0.98	0	0	0.98	1	0	0.02	1.89286	1846.18
1860.46	1889.03	1874.75	415	泥岩	0.5	0.22	0.72	0.26	0.98	0	0	0.98	1	0	0.02	2.27273	1874.75
1889.03	1917.6	1903.32	410	砂质泥岩	0.61	0.2	0.81	0.19	1	0	0	1	1	0	0	3.05	1903.32
1917.6	1946.17	1931.89	417	泥灰岩	0.66	0.18	0.84	0.15	0.99	0	0	0.99	1	0	0.01	3.66667	1931.89
1946.17	1974.74	1960.46	429	细砂岩	0.3	0.18	0.48	0.5	0.98	0	0	0.98	1	0	0.02	1.66667	1960.46
1974.74	2003.31	1989.03	416	砂质泥岩	0.58	0.29	0.87	0.12	0.99	0	0	0.99	1	0	0.01	2	1989.03
2003.31	2031.88	2017.6	419	粉砂岩	0.28	0.25	0.53	0.44	0.97	0	0	0.97	1	0	0.03	1.12	2017.6
2031.88	2060.45	2046.17	421	粉砂岩	0.47	0.35	0.82	0.18	1	0	0	1	1	0	0	1.34286	2046.17
2060.45	2089.02	2074.74	420	粉砂质泥岩	0.37	0.28	0.65	0.32	0.97	0	0	0.97	1	0	0.02	1.32143	2074.74
2089.02	2117.59	2103.31	413	粉砂岩	0.66	0.26	0.92	0.09	1.01	0	0	1.01	1	0	0	2.53846	2103.31
2117.59	2146.16	2131.88	422	粉砂岩	0.64	0.19	0.83	0.17	1	0	0	1	1	0	0.01	3.36842	2131.88
2146.16	2174.73	2160.45	428	泥岩	0.48	0.38	0.86	0.14	1	0	0	1	1	0	0	1.26316	2160.45
2174.73	2203.3	2189.02	423	泥岩	0.26	0.2	0.46	0.54	1	0	0	1	1	0	0	1.3	2189.02
2203.3	2231.87	2217.59	426	泥岩	0.47	0.42	0.89	0.11	1	0	0	1	1	0	0	1.11905	2217.59
2231.87	2260.44	2246.16	427	粉砂岩	0.59	0.33	0.92	0.08	1	0	0	1	1	0	0	1.78788	2246.16
2260.44	2289.01	2274.73	424	粉砂质泥岩	0.16	0.16	0.32	0.65	0.97	0	0	0.97	1	0	0.03	1	2274.73
2289.01	2317.58	2303.3	425	泥岩	0.2	0.16	0.36	0.63	0.99	0	0	0.99	1	0	0	1.25	2303.3
2317.58	2401.79	2359.69	310	灰质泥岩	0.31	0.18	0.49	0.47	0.96	0	0	0.96	1	0	0.02	1.72222	2359.69
2401.79	2486	2443.9	301	灰质泥岩	0.47	0.24	0.71	0.18	0.89	0.08	0	0.97	1	0	0.03	1.95833	2443.9
2486	2570.21	2528.11	308	膏质含灰泥岩	0.36	0.19	0.55	0.22	0.77	0.07	0.14	0.98	1	0	0.02	1.89474	2528.11
2570.21	2654.42	2612.32	311	泥岩	0.44	0.21	0.65	0.31	0.96	0	0	0.96	1	0	0.04	2.09524	2612.32
2654.42	2738.63	2696.53	315	灰质泥岩	0.37	0.2	0.57	0.4	0.97	0	0	0.97	1	0	0.02	1.85	2696.53
2738.63	2822.84	2780.74	302	灰质泥岩	0.38	0.19	0.57	0.34	0.91	0.05	0	0.96	1	0	0.04	2	2780.74
2822.84	2907.05	2864.95	316	泥灰岩	0.31	0.17	0.48	0.43	0.91	0.03	0.03	0.97	1	0	0.03	1.82353	2864.95
2907.05	2991.26	2949.16	319	泥岩-云岩	0.48	0.29	0.77	0.19	0.96	0	0	0.96	1	0	0.04	1.65517	2949.16
2991.26	3075.47	3033.37	313	泥灰岩	0.61	0.24	0.85	0.09	0.94	0	0	0.94	1	0	0.05	2.54167	3033.37
3075.47	3159.68	3117.58	312	膏质泥岩	0.41	0.11	0.52	0.31	0.83	0.18	0	1.01	1	0	0	3.72727	3117.58
3159.68	3243.89	3201.79	314	灰质泥岩	0.36	0.14	0.5	0.41	0.91	0.05	0	0.96	1	0	0.03	2.57143	3201.79
3243.89	3328.1	3286	320	白云岩	0.32	0.14	0.46	0.34	0.8	0.2	0	1	1	0	0	2.28571	3286
3328.1	3412.31	3370.21	317	灰-膏质泥岩	0.19	0.13	0.32	0.29	0.61	0.39	0	1	1	0	0	1.46154	3370.21
3412.31	3496.52	3454.42	318	膏质泥岩	0.32	0.14	0.46	0.48	0.94	0.03	0	0.97	1	0	0.03	2.28571	3454.42
3496.52	3580.73	3538.63	304	泥质灰岩	0.47	0.31	0.78	0.17	0.95	0	0	0.95	1	0	0.04	1.51613	3538.63
3580.73	3664.94	3622.84	303	泥灰岩	0.44	0.16	0.6	0.32	0.92	0.05	0	0.97	1	0	0.03	2.75	3622.84
3664.94	3749.15	3707.05	306	灰质泥岩	0.51	0.19	0.7	0.22	0.92	0.04	0	0.96	1	0	0.04	2.68421	3707.05
3749.15	3833.36	3791.26	307	含泥云灰岩	0.19	0.14	0.33	0.34	0.67	0.3	0	0.97	1	0	0.01	1.35714	3791.26
3833.36	3917.57	3875.47	305	膏质泥岩	0.21	0.17	0.38	0.34	0.72	0.26	0	0.98	1	0	0.01	1.23529	3875.47
3917.57	3940.64	3929.11	201	泥岩	0.52	0.46	0.98	0	0.98	0	0	0.98	1	0.02	0	1.13043	3929.11
3940.64	3963.71	3952.18	202	泥质粉砂岩	0.28	0.21	0.49	0.52	1.01	0	0	1.01	1	0	0	1.33333	3952.18
3963.71	3986.78	3975.25	203	泥质粉砂岩	0.7	0.24	0.94	0.06	1	0	0	1	1	0	0	2.91667	3975.25
3986.78	4009.85	3998.32	204	粉砂质泥岩	0.63	0.24	0.87	0.13	1	0	0	1	1	0	0	2.625	3998.32
4009.85	4032.92	4021.39	205	粉砂质泥岩	0.58	0.26	0.84	0.14	0.98	0	0	0.98	1	0.01	0	2.23077	4021.39
4032.92	4055.99	4044.46	206	粗砂岩	0.88	0.13	1.01	0	1.01	0	0	1.01	1	0	0	6.76923	4044.46
4055.99	4079.06	4067.53	207	砂岩	0.65	0.23	0.88	0.1	0.98	0	0	0.98	1	0.02	0	2.82609	4067.53
4079.06	4102.13	4090.6	208	细砂岩	0.62	0.16	0.78	0.21	0.99	0	0	0.99	1	0.01	0	3.875	4090.6
4102.13	4125.2	4113.67	209	细砾岩	0.76	0.15	0.91	0.11	1.02	0	0	1.02	1	0	0	5.06667	4113.67
4125.2	4148.27	4136.74	210	砂岩	0.53	0.19	0.72	0.28	1	0	0	1	1	0	0	2.78947	4136.74
4148.27	4171.34	4159.81	211	细砾岩	0.85	0.1	0.95	0.05	1	0	0	1	1	0	0	8.5	4159.81
4171.34	4194.41	4182.88	212	细砾岩	0.79	0.1	0.89	0.1	0.99	0	0	0.99	1	0	0	7.9	4182.88
4194.41	4217.48	4205.95	213	灰质泥岩	0.51	0.41	0.92	0.07	0.99	0	0	0.99	1	0	0	1.2439	4205.95

## Sheet: CO同位素原始数据
样品号	编号	方解石δ13C-VPDB‰	方解石δ18O-VPDB‰	白云石δ13C-VPDB‰	白云石δ18O-VPDB‰	石英	斜长石	微斜长石	绿泥石	云母	赤铁矿	黄铁矿	方解石	白云石	硬石膏	钙芒硝	石盐	方沸石	文石
1	627	2.25	10.15			0.36	0.22	0.07	0.1	0.14		0.01	0.1	0
2	626	5.15	13.16			0.34	0.26	0.06	0.06	0.12			0.16	0
3	625	1.93	10.39			0.4	0.16	0.06	0.12	0.17			0.09	0
4	624	2.17	9.55			0.29	0.17	0.06	0.15	0.24			0.09	0
5	623	3.9	9.79			0.3	0.11	0.05	0.1	0.12		0.01	0.31	0
6	622	4.02	11.46			0.25	0.17	0.08	0.08	0.12			0.3	0
7	621	4.51	8.3			0.3	0.16	0.07	0.07	0.07		0.01	0.32	0
8	620	2.55	10.17			0.36	0.16	0.05	0.14	0.18		0.02	0.09	0
9	619	2.68	9.36			0.32	0.24	0.05	0.14	0.13			0.12	0
10	618	7.49	8.53			0.39	0.2	0.08	0.06	0.09		0.01	0.17	0
11	617	2.64	9.71			0.33	0.16	0.04	0.11	0.23		0.01	0.11	0
12	616	1.05	10.06			0.34	0.18	0.06	0.16	0.14			0.11	0
13	615	0.33	5.42			0.16	0.08	0.03	0.07	0.18		0.02	0.36	0.04			0.03	0.03
14	614	1.63	4.1	-1.32772	-5.03627	0.24	0.09	0.07	0.1	0.19		0.03	0.2	0.05				0.04
15	613	0.9	1.34	-1.0332	-1.40893	0.18	0.1	0.04	0.09	0.21		0.04	0.07	0.27
16	612	2.01	5.25	-1.11519	-6.50019	0.28	0.14	0.03	0.13	0.17		0.02	0.21	0				0.02
17	611-1	1.41	5.6			0.25	0.13	0.03	0.13	0.17		0.02	0.21	0			0.03	0.03
18	611	1.8	6.5			0.27	0.12	0.04	0.14	0.19		0.01	0.22	0
19	610	0.27	2.72	-0.0654279	-3.48152	0.17	0.1	0.03	0.07	0.24		0.04	0.18	0.14			0.03
20	609	2.25	5.78			0.26	0.12	0.04	0.11	0.19		0.02	0.18	0			0.03	0.05
21	608	1.01	3.05	0.198791	-2.10962	0.21	0.11	0.04	0.11	0.14		0.03	0.18	0.11			0.02	0.04
22	607	0.61	2.25	-1.16034	-0.266499	0.18	0.14	0.03	0.09	0.18		0.02	0.1	0.24			0.03
23	606	0.63	3.7	-1.62933	-2.72101	0.21	0.11	0.04	0.09	0.25		0.04	0.17	0.07			0.03
24	605	1.22	7.84			0.27	0.14	0.04	0.13	0.27		0.03	0.08	0			0.04
25	604	0.27	0.2	-1.52927	-1.6444	0.23	0.13	0.04	0.09	0.16		0.04	0.09	0.08			0.03		0.12
26	603	1.56	5.26			0.22	0.13	0.04	0.11	0.18		0.02	0.29	0			0.02
27	602	1.29	5.46			0.25	0.12	0.06	0.12	0.21			0.18	0			0.03	0.03
28	601	0.01	2.29	0.15224	-4.09965	0.18	0.1	0.04	0.11	0.16			0.12	0			0.03	0.04	0.22
29	523	0.7	5.36	0.594022	-6.20775	0.12	0.09	0.04	0.07	0.16			0.17	0.17					0.18
30	522	1.97	6.39	2.46461	-6.68646	0.15	0.07	0.03	0.08	0.15			0.27	0.06					0.2
31	521	1.66	7.1	-2.65681	-1.51059	0.29	0.16	0.03	0.1	0.12			0.16	0.11				0.03
32	520	0.61	5.54			0.2	0.12	0.04	0.12	0.25			0.27	0
33	519	1.61	6.12			0.35	0.19	0.04	0.12	0.18			0.11	0
34	518	2.88	8.46			0.33	0.2	0.07	0.06	0.07	0.01		0.25	0
35	517	2.17	9.1			0.35	0.18	0.08	0.13	0.15			0.11	0
36	516	2.38	9.5			0.3	0.16	0.05	0.14	0.23			0.08	0			0.04
37	515	0.17	5.72	-0.489416	-4.55519	0.21	0.13	0.03	0.09	0.17		0.03	0.26	0.06				0.03
38	514	1.73	9.5			0.33	0.18	0.05	0.16	0.15			0.13	0
39	513	3.61	8.51			0.31	0.19	0.06	0.16	0.16			0.12	0
40	512	2.34	9.46			0.4	0.27	0.07	0.06	0.06			0.14	0
41	511	2.83	9.5			0.34	0.23	0.07	0.1	0.08			0.17	0
42	510	2.75	9.02			0.35	0.21	0.09	0.1	0.08			0.18	0
43	509	1.72	9.14			0.32	0.28	0.08	0.08	0.08			0.16	0
44	508	2.05	9.76			0.33	0.19	0.06	0.17	0.11			0.13	0
45	507	3.16	8.08			0.3	0.19	0.03	0.1	0.11			0.27	0
46	506	0.93	7.37			0.24	0.13	0.05	0.09	0.18		0.03	0.29	0
47	505	2.01	9.05			0.35	0.18	0.05	0.14	0.17			0.11	0
48	504	1.67	9.07			0.29	0.15	0.04	0.15	0.22	0.02		0.13	0
49	503	1.1	8.81			0.33	0.22	0.05	0.17	0.13			0.09	0
50	502	2.42	8.21			0.25	0.1	0.04	0.13	0.2	0.02		0.26	0
51	501	1.05	8.95			0.26	0.15	0.05	0.17	0.23	0.02		0.13	0
52	429	1.16	7.14	-1.78205	-6.55505	0.17	0.09	0.04	0.08	0.1		0.02	0.24	0.26
53	428	1.58	9.24			0.27	0.17	0.04	0.15	0.19			0.14	0				0.04
54	427	1.17	9.24			0.3	0.22	0.07	0.14	0.16			0.08	0				0.03
55	426	1.27	8.45			0.27	0.16	0.04	0.12	0.23			0.11	0				0.07
56	425	3.22	6.66	3.49488	-7.36728	0.1	0.08	0.02	0.06	0.1			0.15	0.04					0.44
57	424	3.41	5.13	3.2865	-6.38171	0.07	0.07	0.02	0.05	0.08		0.03	0.1	0.09				0.03	0.46
58	423	2.08	5.57	1.19928	-4.9068	0.14	0.09	0.03	0.06	0.12			0.2	0.09				0.02	0.25
59	422	2.35	9.93			0.34	0.25	0.05	0.08	0.08		0.01	0.17	0				0.03
60	421	1.1	8.5			0.28	0.14	0.05	0.16	0.19			0.18	0
61	420	0.76	7.94	0.47152	-7.62719	0.2	0.13	0.04	0.09	0.19		0.02	0.28	0.04
62	419	0.02	6.5	-1.34863	-5.97821	0.16	0.09	0.03	0.08	0.13		0.03	0.33	0.11				0.04
63	418	1.96	10.24			0.29	0.15	0.05	0.11	0.22		0.03	0.09	0				0.07
64	417	2.45	10.46			0.35	0.25	0.06	0.07	0.08		0.01	0.15	0				0.03
65	416	1.93	9.35			0.34	0.19	0.05	0.1	0.14		0.01	0.12	0				0.05
66	415	0.34	8.36			0.26	0.2	0.04	0.07	0.11		0.02	0.26	0				0.04
67	414	0.25	7.61			0.3	0.18	0.05	0.1	0.13		0.02	0.17	0				0.05
68	413	1.74	8.63			0.34	0.26	0.06	0.1	0.13			0.09	0				0.03
69	412	2.66	9.28			0.3	0.22	0.06	0.08	0.12		0.03	0.11	0				0.08
70	411	0.13	6.59	0.219036	-6.21889	0.2	0.13	0.03	0.05	0.11			0.37	0.06				0.04
71	410	3.23	8.09	-3.0296	-6.95506	0.33	0.24	0.04	0.08	0.1			0.14	0.05				0.02
72	409	2.25	9.81			0.33	0.27	0.07	0.12	0.11			0.07	0				0.03
73	408	1.61	6.66			0.21	0.12	0.04	0.15	0.35			0.09	0				0.04
74	407	3.12	9.84			0.35	0.19	0.06	0.11	0.16			0.07	0				0.06
75	406	0.32	8.63			0.17	0.12	0.03	0.07	0.2			0.41	0
76	405	1.91	10.35			0.36	0.35	0.05	0.05	0.06			0.09	0				0.03
77	404	3.42	10.3			0.32	0.28	0.09	0.08	0.09			0.15	0
78	403	3.68	10.08			0.38	0.28	0.07	0.08	0.09			0.09	0
79	402	0.38	8.78			0.27	0.15	0.04	0.12	0.14			0.28	0	0
80	320	1.92	0.02	-2.01445	-0.0906715	0.08	0.21	0.03	0.04	0.1				0.34	0	0.2
81	319	0.88	6.4	-1.23333	-6.1006	0.21	0.23	0.04	0.1	0.19		0.04	0.12	0.07	0
82	318	0.08	4.73	0.0365715	-3.68344	0.13	0.15	0.04	0.05	0.09		0.03	0.22	0.26	0.03
83	317	0.58	5.73	0.775584	-5.1908	0.08	0.11		0.05	0.08			0.2	0.09	0.39
84	316	0.56	2.24	0.122581	-2.25181	0.13	0.13	0.05	0.06	0.11		0.03	0.11	0.32	0	0.03	0.03
85	315	0.41	6.56	-0.16588	-6.79453	0.17	0.17	0.03	0.09	0.11		0.02	0.34	0.06	0
86	314	2.66	3.64	-3.29833	-1.95335	0.12	0.18	0.06	0.04	0.1		0.03	0.12	0.29	0.05
87	313	1.18	4.26	-1.2047	-4.84317	0.22	0.32	0.07	0.08	0.16		0.05		0.09	0
88	312	1.26	1.96	-1.32695	-2.02694	0.17	0.21	0.03	0.04	0.07				0.31	0.18
89	311	1.23	9.85	-1.42869	-9.72831	0.17	0.21	0.06	0.09	0.12		0.04	0.27	0.04	0
90	310	0.82	3.73	0.336638	-3.97598	0.12	0.13	0.06	0.06	0.12		0.02	0.24	0.23	0
91	308	2.35	1.93	-2.40329	-1.96657	0.16	0.17	0.03	0.06	0.13		0.02		0.22	0	0.07	0.14
92	307	0.75	2.19	-1.05821	-1.9313	0.09	0.09	0.01	0.05	0.09		0.01	0.07	0.27	0.3
93	306	1.99	7.68	-1.94397	-7.80695	0.16	0.31	0.04	0.06	0.13		0.04	0.18	0.04	0.04
94	305	0.58	3.58	-0.511079	-3.30801	0.07	0.12	0.02	0.05	0.12		0.01	0.16	0.18	0.26
95	304	0.82	8.21			0.23	0.2	0.04	0.09	0.22		0.04	0.17	0	0
96	303	0.95	7.09	-1.04661	-5.73573	0.18	0.21	0.05	0.06	0.1		0.03	0.25	0.07	0.05
97	302	0	5.72	-0.0507276	-3.34404	0.15	0.19	0.04	0.07	0.12		0.04	0.23	0.11	0.05
98	301	1.15	10.36			0.19	0.23	0.05	0.1	0.14		0.03	0.18	0	0.08
99	213	1.92	11.82			0.34	0.14	0.03	0.13	0.28			0.07	0	0
100	212	4.34	12.27			0.43	0.29	0.07	0.02	0.08			0.1	0	0
101	211	4.75	14.65			0.36	0.43	0.06	0.03	0.07			0.05	0	0
102	210	3.4	11.12			0.32	0.16	0.05	0.09	0.1			0.28	0	0
103	209	4.09	14.43			0.4	0.27	0.09	0.05	0.1			0.11	0	0
104	208	5.84	13.22			0.31	0.26	0.05	0.05	0.11	0.01		0.21	0	0
105	207	3.85	11.93			0.37	0.22	0.06	0.09	0.14	0.02		0.1	0	0
106	205	2.92	12.97			0.38	0.17	0.03	0.08	0.18	0.01		0.14	0	0
107	204	5.88	11.98			0.44	0.16	0.03	0.07	0.17			0.13	0	0
108	203	3.09	12.23			0.49	0.18	0.03	0.07	0.17			0.06	0	0
109	202	2.4	7.4			0.15	0.11	0.02	0.05	0.16			0.49	0.03	0
	201
	201和206样品只有XRD数据，没有碳氧同位素

## Sheet: 上干+下油
地层	顶深	深度	样品名称	岩性	石英	斜长石	微斜长石	井号	方解石δ13C-VPDB‰	方解石δ18O-VPDB‰	白云石δ13C-VPDB‰	白云石δ18O-VPDB‰	碎屑颗粒	绿泥石	云母	方沸石	粘土	方解石	白云石	铁白云石	文石	碳酸盐	硬石膏	钙芒硝	硫酸盐	石盐	赤铁矿	黄铁矿	总和	总化学沉积物	砂/泥
下油砂山组N21	1	539.548	516	灰色泥岩	0.3	0.16	0.05	英东104	-2.38	-9.5			0.51	0.14	0.23	-	0.37	0.08	-	--	-	0.08	-	-	0	0.04	0	0	1	0.12
	2	669.958	501	灰色含灰泥岩	0.26	0.15	0.05	绿11	-1.05	-8.95			0.46	0.17	0.23	-	0.4	0.13	-	-	-	0.13	-	-	0	0	0.02	0	1.01	0.13
	3	713.428	508	棕灰色含灰泥质粉砂岩	0.33	0.19	0.06	英东102	-2.05	-9.76			0.58	0.17	0.11	-	0.28	0.13	-	-	-	0.13	-	-	0	0	0	0	0.99	0.13
	4	756.898	509	浅褐色泥质粉砂岩	0.32	0.28	0.08	英东102	-1.72	-9.14			0.68	0.08	0.08	-	0.16	0.16	-	-	-	0.16	-	-	0	0	0	0	1	0.16
	5	800.368	517	灰色含灰泥岩	0.35	0.18	0.08	英东104	-2.17	-9.1			0.61	0.13	0.15	-	0.28	0.11	-	-	-	0.11	-	-	0	0	0	0	1	0.11
	6	843.838	510	灰色泥质粉砂岩	0.35	0.21	0.09	英东102	-2.75	-9.02			0.65	0.1	0.08	-	0.18	0.18	-	-	-	0.18	-	-	0	0	0	0	1.01	0.18
	7	887.308	513	浅灰色含灰粉砂质泥岩	0.31	0.19	0.06	英东103	-3.61	-8.51			0.56	0.16	0.16	-	0.32	0.12	-	-	-	0.12	-	-	0	0	0	0	1	0.12
	8	930.778	511	浅灰色泥质粉砂岩	0.34	0.23	0.07	英东102	-2.83	-9.5			0.64	0.1	0.08	-	0.18	0.17	-	-	-	0.17	-	-	0	0	0	0	0.99	0.17
	9	974.248	512	灰白色泥质细砂岩	0.4	0.27	0.07	英东102	-2.34	-9.46			0.74	0.06	0.06	-	0.12	0.14	-	-	-	0.14	-	-	0	0	0	0	1	0.14
	10	583.018	502	灰色灰质泥岩	0.25	0.1	0.04	砂41	-2.42	-8.21			0.39	0.13	0.2	-	0.33	0.26	-	-	-	0.26	-	-	0	0	0.02	0	1	0.26
	11	626.488	514	灰色含灰泥质粉砂岩	0.33	0.18	0.05	英东103	-1.73	-9.5			0.56	0.16	0.15	-	0.31	0.13	-	-	-	0.13	-	-	0	0	0	0	1	0.13
	12	1017.72	503	灰色含灰粉砂质泥岩	0.33	0.22	0.05	砂41	-1.1	-8.81			0.6	0.17	0.13	-	0.3	0.09	-	-	-	0.09	-	-	0	0	0	0	0.99	0.09
	13	1061.19	504	深灰色含灰泥岩	0.29	0.15	0.04	砂41	-1.67	-9.07			0.48	0.15	0.22	-	0.37	0.13	-	-	-	0.13	-	-	0	0	0.02	0	1	0.13
	14	1104.66	505	深灰色含灰泥岩	0.35	0.18	0.05	砂41	-2.01	-9.05			0.58	0.14	0.17	-	0.31	0.11	-	-	-	0.11	-	-	0	0	0	0	1	0.11
	15	1148.13	518	灰色泥质粉砂岩	0.33	0.2	0.07	英东106	-2.88	-8.46			0.6	0.06	0.07	-	0.13	0.25	-	-	-	0.25	-	-	0	0	0.01	0	0.99	0.25
	16	1191.6	519	青灰色含灰粉砂质泥岩	0.35	0.19	0.04	英东106	-1.61	-6.12			0.58	0.12	0.18	-	0.3	0.11	-	-	-	0.11	-	-	0	0	0	0	0.99	0.11
	17	1235.07	506	深灰色灰质泥岩	0.24	0.13	0.05	砂41	-0.93	-7.37			0.42	0.09	0.18	-	0.27	0.29	-	-	-	0.29	-	-	0	0	0	0.03	1.01	0.29
	18	1278.54	515	灰色灰质泥岩	0.21	0.13	0.03	英东103	-0.17	-5.72	-0.49	-4.56	0.37	0.09	0.17	0.03	0.29	0.26	-	0.06	-	0.32	-	-	0	0	0	0.03	1.01	0.32
	19	1322.01	507	灰色泥质粉砂岩	0.3	0.19	0.03	砂41	-3.16	-8.08			0.52	0.1	0.11	-	0.21	0.27	-	-	-	0.27	-	-	0	0	0	0	1	0.27
	20	1365.48	520	灰色灰质泥岩	0.2	0.12	0.04	扎11	-0.61	-5.54			0.36	0.12	0.25	-	0.37	0.27	-	-	-	0.27	-	-	0	0	0	0	1	0.27
	21	1408.95	521	青灰色灰质泥岩	0.29	0.16	0.03	扎102	-1.66	-7.1	-2.66	-1.51	0.48	0.1	0.12	0.03	0.25	0.16	-	0.11	-	0.27	-	-	0	0	0	0	1	0.27
	22	1452.42	522	灰色泥晶灰岩	0.15	0.07	0.03	扎2	1.97	-6.39	2.46	-6.69	0.25	0.08	0.15	-	0.23	0.27	-	0.06	0.2	0.53	-	-	0	0	0	0	1.01	0.53
	23	1495.89	523	灰绿色泥晶灰岩	0.12	0.09	0.04	扎3	0.7	-5.36	0.59	-6.21	0.25	0.07	0.16	-	0.23	0.17	-	0.17	0.18	0.52	-	-	0	0	0	0	1	0.52
上干柴沟组N1	24	1531.91	402	灰色灰质粉砂质泥岩	0.27	0.15	0.04	扎2	-0.38	-8.78			0.46	0.12	0.14	-	0.26	0.28	-	-	-	0.28	-	-	0	0	0	0	1	0.28
	25	1560.48	403	灰绿色含灰粉砂岩	0.38	0.28	0.07	扎3	-3.68	-10.08			0.73	0.08	0.09	-	0.17	0.09	-	-	-	0.09	-	-	0	0	0	0	0.99	0.09
	26	1589.05	404	浅灰色含灰泥质粉砂岩	0.32	0.28	0.09	扎3	-3.42	-10.3			0.69	0.08	0.09	-	0.17	0.15	-	-	-	0.15	-	-	0	0	0	0	1.01	0.15
	27	1617.62	405	棕灰色含灰细砂岩	0.36	0.35	0.05	扎2	-1.91	-10.35			0.76	0.05	0.06	0.03	0.14	0.09	-	-	-	0.09	-	-	0	0	0	0	0.99	0.09
	28	1674.76	406	深灰色纹层状粉砂质泥晶灰岩	0.17	0.12	0.03	扎3	0.32	-8.63			0.32	0.07	0.2	-	0.27	0.41	-	-	-	0.41	-	-	0	0	0	0	1	0.41
	29	1646.19	407	棕褐色粉砂质泥岩	0.35	0.19	0.06	扎2	-3.12	-9.84			0.6	0.11	0.16	0.06	0.33	0.07	-	-	-	0.07	-	-	0	0	0	0	1	0.07
	30	1703.33	408	灰褐色泥质粉砂岩	0.21	0.12	0.04	扎2	-1.61	-6.66			0.37	0.15	0.35	0.04	0.54	0.09	-	-	-	0.09	-	-	0	0	0	0	1	0.09
	31	1731.9	411	灰色泥质粉砂岩	0.2	0.13	0.03	扎7	0.13	-6.59	0.22	-6.22	0.36	0.05	0.11	0.04	0.2	0.37	-	0.06	-	0.43	-	-	0	0	0	0	0.99	0.43
	32	1760.47	409	棕灰色泥质粉砂岩	0.33	0.27	0.07	扎2	-2.25	-9.81			0.67	0.12	0.11	0.03	0.26	0.07	-	-	-	0.07	-	-	0	0	0	0	1	0.07
	33	1903.32	410	棕褐色细砂质泥岩	0.33	0.24	0.04	扎207	-3.23	-8.09	-3.03	-6.96	0.61	0.08	0.1	0.02	0.2	0.14	-	0.05	-	0.19	-	-	0	0	0	0	1	0.19
	34	2103.31	413	灰黄色泥质粉砂岩	0.34	0.26	0.06	扎207	-1.74	-8.63			0.66	0.1	0.13	0.03	0.26	0.09	-	-	-	0.09	-	-	0	0	0	0	1.01	0.09
	35	1817.61	412	灰色含灰泥岩	0.3	0.22	0.06	扎8	-2.66	-9.28			0.58	0.08	0.12	0.08	0.28	0.11	-	-	-	0.11	-	-	0	0	0	0.03	1	0.11
	36	1846.18	414	纹层状深灰色含灰泥岩	0.3	0.18	0.05	扎4	-0.25	-7.61			0.53	0.1	0.13	0.05	0.28	0.17	-	-	-	0.17	-	-	0	0	0	0.02	1	0.17
	37	1874.75	415	纹层状灰色泥质粉砂岩	0.26	0.2	0.04	扎4	-0.34	-8.36			0.5	0.07	0.11	0.04	0.22	0.26	-	-	-	0.26	-	-	0	0	0	0.02	1	0.26
	38	1989.03	416	灰色细砂质泥岩	0.34	0.19	0.05	扎201	-1.93	-9.35			0.58	0.1	0.14	0.05	0.29	0.12	-	-	-	0.12	-	-	0	0	0	0.01	1	0.12
	39	1931.89	417	灰色泥岩	0.35	0.25	0.06	扎3	-2.45	-10.46			0.66	0.07	0.08	0.03	0.18	0.15	-	-	-	0.15	-	-	0	0	0	0.01	1	0.15
	40	1789.04	418	深灰色粉砂质泥岩	0.29	0.15	0.05	扎206	-1.96	-10.24			0.49	0.11	0.22	0.07	0.4	0.09	-	-	-	0.09	-	-	0	0	0	0.03	1.01	0.09
	41	1960.46	429	灰色含粉砂灰岩	0.17	0.09	0.04	扎204	-1.16	-7.14	-1.78	-6.56	0.3	0.08	0.1	-	0.18	0.24	-	0.26	-	0.5	-	-	0	0	0	0.02	1	0.5
	42	2017.6	419	灰色灰质粉砂岩	0.16	0.09	0.03	扎2	-0.02	-6.5	-1.35	-5.98	0.28	0.08	0.13	0.04	0.25	0.33	-	0.11	-	0.44	-	-	0	0	0	0.03	1	0.44
	43	2074.74	420	浅灰色粉砂质泥岩	0.2	0.13	0.04	扎2	0.76	-7.94	0.47	-7.63	0.37	0.09	0.19	-	0.28	0.28	-	0.04	-	0.32	-	-	0	0	0	0.02	0.99	0.32
	44	2046.17	421	棕褐色泥质粉砂岩	0.28	0.14	0.05	扎203	-1.1	-8.5			0.47	0.16	0.19	-	0.35	0.18	-	-	-	0.18	-	-	0	0	0	0	1	0.18
	45	2131.88	422	棕褐色粉砂质泥岩	0.34	0.25	0.05	扎203	-2.35	-9.93			0.64	0.08	0.08	0.03	0.19	0.17	-	-	-	0.17	-	-	0	0	0	0.01	1.01	0.17
	46	2189.02	423	灰色纹层状泥晶灰岩	0.14	0.09	0.03	扎5	2.08	-5.57	1.2	-4.91	0.26	0.06	0.12	0.02	0.2	0.2	-	0.09	0.25	0.54	-	-	0	0	0	0	1	0.54
	47	2274.73	424	含粉砂泥晶颗粒灰岩	0.07	0.07	0.02	扎5	3.41	-5.13	3.29	-6.38	0.16	0.05	0.08	0.03	0.16	0.1	-	0.09	0.46	0.65	-	-	0	0	0	0.03	1	0.65
	48	2303.3	425	纹层状深灰色含粉砂灰岩	0.1	0.08	0.02	扎5	3.22	-6.66	3.49	-7.37	0.2	0.06	0.1	-	0.16	0.15	-	0.04	0.44	0.63	-	-	0	0	0	0	0.99	0.63
	49	2217.59	426	棕褐色粉砂质泥岩	0.27	0.16	0.04	扎202	-1.27	-8.45			0.47	0.12	0.23	0.07	0.42	0.11	-	-	-	0.11	-	-	0	0	0	0	1	0.11
	50	2246.16	427	青灰色泥质粉砂岩	0.3	0.22	0.07	扎202	-1.17	-9.24			0.59	0.14	0.16	0.03	0.33	0.08	-	-	-	0.08	-	-	0	0	0	0	1	0.08
	51	2160.45	428	棕褐色泥岩	0.27	0.17	0.04	扎201	-1.58	-9.24			0.48	0.15	0.19	0.04	0.38	0.14	-	-	-	0.14	-	-	0	0	0	0	1	0.14
平均值									-1.3302	-8.3349	0.200833	-5.915	0.503137	0.103922	0.144118	0.0404545	0.26549	0.17098	#DIV/0!	0.095	0.306	0.223333	#DIV/0!	#DIV/0!	0	0.000784314	0.00137255	0.00568627
标准差									1.58058	1.43902
																						0.765786

## Sheet: 总表 （原始版）
样品名称	年龄	岩性	石英	斜长石	微斜长石	井号	方解石δ13C-VPDB‰	方解石δ18O-VPDB‰	白云石δ13C-VPDB‰	白云石δ18O-VPDB‰	碎屑颗粒	绿泥石	云母	方沸石	粘土	方解石	白云石	铁白云石	文石	碳酸盐	硬石膏	钙芒硝	硫酸盐	石盐	赤铁矿	黄铁矿	总和	总化学沉积物	砂/泥
601	9.28811	灰色粉砂质灰质泥岩	0.18	0.1	0.04	梁101	-0.01	-2.29	0.15	-4.1	0.32	0.11	0.16	0.04	0.31	0.12	-	-	0.22	0.34	-	-	0	0.03	0	0	1	0.37	1.03226	1
602	9.32019	灰色灰质泥岩	0.25	0.12	0.06	梁101	-1.29	-5.46			0.43	0.12	0.21	0.03	0.36	0.18	-	-	-	0.18	-	-	0	0.03	0	0	1	0.21	1.19444	2
603	11.4163	浅灰色灰质泥岩	0.22	0.13	0.04	梁105	-1.56	-5.26			0.39	0.11	0.18	-	0.29	0.29	-	-	-	0.29	-	-	0	0.02	0	0.02	1.01	0.31	1.34483	3
604	11.6505	灰色灰质泥岩	0.23	0.13	0.04	梁105	-0.27	0.2	-1.53	-1.64	0.4	0.09	0.16	-	0.25	0.09	-	0.08	0.12	0.29	-	-	0	0.03	0	0.04	1.01	0.32	1.6	4
605	11.8733	灰色含灰泥岩	0.27	0.14	0.04	梁105	-1.22	-7.84			0.45	0.13	0.27	-	0.4	0.08	-	-	-	0.08	-	-	0	0.04	0	0.03	1	0.12	1.125	5
606	11.5975	灰色灰质泥岩	0.21	0.11	0.04	梁108	-0.63	-3.7	-1.63	-2.72	0.36	0.09	0.25	-	0.34	0.17	-	0.07	-	0.24	-	-	0	0.03	0	0.04	1.01	0.27	1.05882	6
607	11.7638	浅灰色灰质泥岩	0.18	0.14	0.03	梁108	-0.61	-2.25	-1.16	-0.27	0.35	0.09	0.18	-	0.27	0.1	-	0.24	-	0.34	-	-	0	0.03	0	0.02	1.01	0.37	1.2963	7
608	12.322	浅灰色灰质泥岩	0.21	0.11	0.04	梁108	1.01	-3.05	0.2	-2.11	0.36	0.11	0.14	0.04	0.29	0.18	-	0.11	-	0.29	-	-	0	0.02	0	0.03	0.99	0.31	1.24138	8	500m	17.8571
609	10.9434	灰色含灰泥岩	0.26	0.12	0.04	梁中3-3	-2.25	-5.78			0.42	0.11	0.19	0.05	0.35	0.18	-	-	-	0.18	-	-	0	0.03	0	0.02	1	0.21	1.2	9
610	10.9929	灰色灰质泥岩	0.17	0.1	0.03	梁中3-3	-0.27	-2.72	-0.07	-3.48	0.3	0.07	0.24	-	0.31	0.18	-	0.14	-	0.32	-	-	0	0.03	0	0.04	1	0.35	0.967742	10
611-1	11.4665	纹层状灰色灰质泥岩	0.25	0.13	0.03	梁中3-3	-1.41	-5.6			0.41	0.13	0.17	0.03	0.33	0.21	-	-	-	0.21	-	-	0	0.03	0	0.02	1	0.24	1.24242	11
611	11.4844	灰色含灰泥岩	0.27	0.12	0.04	梁中3-3	-1.8	-6.5			0.43	0.14	0.19	-	0.33	0.22	-	-	-	0.22	-	-	0	0	0	0.01	0.99	0.22	1.30303	12
612	11.6446	灰色含灰泥岩	0.28	0.14	0.03	梁中3-3	-2.01	-5.25	-1.12	-6.5	0.45	0.13	0.17	0.02	0.32	0.21	-	-	-	0.21	-	-	0	0	0	0.02	1	0.21	1.40625	13
613	11.7772	深灰色灰质泥岩	0.18	0.1	0.04	梁中3-3	-0.9	-1.34	-1.03	-1.41	0.32	0.09	0.21	-	0.3	0.07	-	0.27	-	0.34	-	-	0	0	0	0.04	1	0.34	1.06667	14
614	12.4293	灰色灰质泥岩	0.24	0.09	0.07	梁中3-3	-1.63	-4.1	-1.33	-5.04	0.4	0.1	0.19	0.04	0.33	0.2	-	0.05	-	0.25	-	-	0	0	0	0.03	1.01	0.25	1.21212	15
615	12.5719	深灰色灰质泥岩	0.16	0.08	0.03	梁中3-3	0.33	-5.42			0.27	0.07	0.18	0.03	0.28	0.36	-	0.04	-	0.4	-	-	0	0.03	0	0.02	1	0.43	0.964286	16
616	8.82595	棕红色含灰泥质粉砂岩	0.34	0.18	0.06	砂37	-1.05	-10.06			0.58	0.16	0.14	-	0.3	0.11	-	-	-	0.11	-	-	0	0	0	0	0.99	0.11	1.93333	17
624	8.81756	灰色含灰泥质粉砂岩	0.29	0.17	0.06	英东105	-2.17	-9.55			0.52	0.15	0.24	-	0.39	0.09	-	-	-	0.09	-	-	0	0	0	0	1	0.09	1.33333	18
621	10.9695	灰白色泥灰质粉砂岩	0.3	0.17	0.07	砂45	-4.51	-8.3			0.54	0.07	0.07	-	0.14	0.32	-	-	-	0.32	-	-	0	0	0	0.01	1.01	0.32	3.85714	19
625	10.7017	浅灰色含灰泥质粉砂岩	0.4	0.15	0.06	英东105	-1.93	-10.39			0.61	0.12	0.17	-	0.29	0.09	-	-	-	0.09	-	-	0	0	0	0	0.99	0.09	2.10345	20
622	11.7978	灰色泥质粉砂岩	0.25	0.17	0.08	砂45	-4.02	-11.46			0.5	0.08	0.12	-	0.2	0.3	-	-	-	0.3	-	-	0	0	0	0	1	0.3	2.5	21
618	12.5842	浅灰色泥质粉砂岩	0.39	0.2	0.08	砂39	-7.49	-8.53			0.67	0.06	0.09	-	0.15	0.17	-	-	-	0.17	-	-	0	0	0	0.01	1	0.17	4.46667	22
623	12.2166	棕褐色泥质粉砂岩	0.3	0.12	0.05	砂45	-3.9	-9.79			0.47	0.1	0.12	-	0.22	0.31	-	-	-	0.31	-	-	0	0	0	0.01	1.01	0.31	2.13636	23
617	13.8235	棕褐色含灰粉砂质泥岩	0.33	0.16	0.04	砂38	-2.64	-9.71			0.53	0.11	0.23	-	0.34	0.11	-	-	-	0.11	-	-	0	0	0	0.01	0.99	0.11	1.55882	24
627	12.4504	灰棕色含灰钙质粉砂岩	0.36	0.22	0.07	英东201	-2.25	-10.15			0.65	0.1	0.14	-	0.24	0.1	-	-	-	0.1	-	-	0	0	0	0.01	1	0.1	2.70833	25
626	13.5201	棕褐色含灰泥细砂岩	0.34	0.26	0.06	英东107	-5.15	-13.16			0.66	0.06	0.12	-	0.18	0.16	-	-	-	0.16	-	-	0	0	0	0	1	0.16	3.66667	26
619	14.557	棕褐色含灰泥质粉砂岩	0.32	0.23	0.05	砂40	-2.68	-9.36			0.6	0.14	0.13	-	0.27	0.12	-	-	-	0.12	-	-	0	0	0	0	0.99	0.12	2.22222	27
620	14.7672	棕褐色含灰粉砂质泥岩	0.36	0.17	0.05	砂40	-2.55	-10.17			0.58	0.14	0.18	-	0.32	0.09	-	-	-	0.09	-	-	0	0	0	0.02	1.01	0.09	1.8125	28
516	14.766	灰色泥岩	0.3	0.16	0.05	英东104	-2.38	-9.5			0.51	0.14	0.23	-	0.37	0.08	-	--	-	0.08	-	-	0	0.04	0	0	1	0.12	1.37838	29
501	16.0833	灰色含灰泥岩	0.26	0.15	0.05	绿11	-1.05	-8.95			0.46	0.17	0.23	-	0.4	0.13	-	-	-	0.13	-	-	0	0	0.02	0	1.01	0.13	1.15	32
508	16.4778	棕灰色含灰泥质粉砂岩	0.33	0.19	0.06	英东102	-2.05	-9.76			0.58	0.17	0.11	-	0.28	0.13	-	-	-	0.13	-	-	0	0	0	0	0.99	0.13	2.07143	33
509	16.4778	浅褐色泥质粉砂岩	0.32	0.28	0.08	英东102	-1.72	-9.14			0.68	0.08	0.08	-	0.16	0.16	-	-	-	0.16	-	-	0	0	0	0	1	0.16	4.25	34
517	16.8722	灰色含灰泥岩	0.35	0.18	0.08	英东104	-2.17	-9.1			0.61	0.13	0.15	-	0.28	0.11	-	-	-	0.11	-	-	0	0	0	0	1	0.11	2.17857	35
510	17.2667	灰色泥质粉砂岩	0.35	0.21	0.09	英东102	-2.75	-9.02			0.65	0.1	0.08	-	0.18	0.18	-	-	-	0.18	-	-	0	0	0	0	1.01	0.18	3.61111	36
513	17.6611	浅灰色含灰粉砂质泥岩	0.31	0.19	0.06	英东103	-3.61	-8.51			0.56	0.16	0.16	-	0.32	0.12	-	-	-	0.12	-	-	0	0	0	0	1	0.12	1.75	37
511	18.0556	浅灰色泥质粉砂岩	0.34	0.23	0.07	英东102	-2.83	-9.5			0.64	0.1	0.08	-	0.18	0.17	-	-	-	0.17	-	-	0	0	0	0	0.99	0.17	3.55556	38	43.4783
512	18.0556	灰白色泥质细砂岩	0.4	0.27	0.07	英东102	-2.34	-9.46			0.74	0.06	0.06	-	0.12	0.14	-	-	-	0.14	-	-	0	0	0	0	1	0.14	6.16667	39
502	18.45	灰色灰质泥岩	0.25	0.1	0.04	砂41	-2.42	-8.21			0.39	0.13	0.2	-	0.33	0.26	-	-	-	0.26	-	-	0	0	0.02	0	1	0.26	1.18182	30
514	18.45	灰色含灰泥质粉砂岩	0.33	0.18	0.05	英东103	-1.73	-9.5			0.56	0.16	0.15	-	0.31	0.13	-	-	-	0.13	-	-	0	0	0	0	1	0.13	1.80645	31
503	18.8444	灰色含灰粉砂质泥岩	0.33	0.22	0.05	砂41	-1.1	-8.81			0.6	0.17	0.13	-	0.3	0.09	-	-	-	0.09	-	-	0	0	0	0	0.99	0.09	2	40
504	19.2389	深灰色含灰泥岩	0.29	0.15	0.04	砂41	-1.67	-9.07			0.48	0.15	0.22	-	0.37	0.13	-	-	-	0.13	-	-	0	0	0.02	0	1	0.13	1.2973	41
505	19.6333	深灰色含灰泥岩	0.35	0.18	0.05	砂41	-2.01	-9.05			0.58	0.14	0.17	-	0.31	0.11	-	-	-	0.11	-	-	0	0	0	0	1	0.11	1.87097	42
518	19.6333	灰色泥质粉砂岩	0.33	0.2	0.07	英东106	-2.88	-8.46			0.6	0.06	0.07	-	0.13	0.25	-	-	-	0.25	-	-	0	0	0.01	0	0.99	0.25	4.61538	43
519	20.4222	青灰色含灰粉砂质泥岩	0.35	0.19	0.04	英东106	-1.61	-6.12			0.58	0.12	0.18	-	0.3	0.11	-	-	-	0.11	-	-	0	0	0	0	0.99	0.11	1.93333	44
506	20.8167	深灰色灰质泥岩	0.24	0.13	0.05	砂41	-0.93	-7.37			0.42	0.09	0.18	-	0.27	0.29	-	-	-	0.29	-	-	0	0	0	0.03	1.01	0.29	1.55556	45
515	20.8167	灰色灰质泥岩	0.21	0.13	0.03	英东103	-0.17	-5.72	-0.49	-4.56	0.37	0.09	0.17	0.03	0.29	0.26	-	0.06	-	0.32	-	-	0	0	0	0.03	1.01	0.32	1.27586	46
507	21.2111	灰色泥质粉砂岩	0.3	0.19	0.03	砂41	-3.16	-8.08			0.52	0.1	0.11	-	0.21	0.27	-	-	-	0.27	-	-	0	0	0	0	1	0.27	2.47619	47
520	21.5529	灰色灰质泥岩	0.2	0.12	0.04	扎11	-0.61	-5.54			0.36	0.12	0.25	-	0.37	0.27	-	-	-	0.27	-	-	0	0	0	0	1	0.27	0.972973	48
521	21.6641	青灰色灰质泥岩	0.29	0.16	0.03	扎102	-1.66	-7.1	-2.66	-1.51	0.48	0.1	0.12	0.03	0.25	0.16	-	0.11	-	0.27	-	-	0	0	0	0	1	0.27	1.92	49
522	21.7314	灰色泥晶灰岩	0.15	0.07	0.03	扎2	1.97	-6.39	2.46	-6.69	0.25	0.08	0.15	-	0.23	0.27	-	0.06	0.2	0.53	-	-	0	0	0	0	1.01	0.53	1.08696	50
523	21.6776	灰绿色泥晶灰岩	0.12	0.09	0.04	扎3	0.7	-5.36	0.59	-6.21	0.25	0.07	0.16	-	0.23	0.17	-	0.17	0.18	0.52	-	-	0	0	0	0	1	0.52	1.08696	51
402	22.4805	灰色灰质粉砂质泥岩	0.27	0.15	0.04	扎2	-0.38	-8.78			0.46	0.12	0.14	-	0.26	0.28	-	-	-	0.28	-	-	0	0	0	0	1	0.28	1.76923	52
403	23.5468	灰绿色含灰粉砂岩	0.38	0.28	0.07	扎3	-3.68	-10.08			0.73	0.08	0.09	-	0.17	0.09	-	-	-	0.09	-	-	0	0	0	0	0.99	0.09	4.29412	53
404	23.6857	浅灰色含灰泥质粉砂岩	0.32	0.28	0.09	扎3	-3.42	-10.3			0.69	0.08	0.09	-	0.17	0.15	-	-	-	0.15	-	-	0	0	0	0	1.01	0.15	4.05882	54
405	23.5758	棕灰色含灰细砂岩	0.36	0.35	0.05	扎2	-1.91	-10.35			0.76	0.05	0.06	0.03	0.14	0.09	-	-	-	0.09	-	-	0	0	0	0	0.99	0.09	5.42857	55
406	23.8318	深灰色纹层状粉砂质泥晶灰岩	0.17	0.12	0.03	扎3	0.32	-8.63			0.32	0.07	0.2	-	0.27	0.41	-	-	-	0.41	-	-	0	0	0	0	1	0.41	1.18519	57
407	23.6667	棕褐色粉砂质泥岩	0.35	0.19	0.06	扎2	-3.12	-9.84			0.6	0.11	0.16	0.06	0.33	0.07	-	-	-	0.07	-	-	0	0	0	0	1	0.07	1.81818	56
408	23.8052	灰褐色泥质粉砂岩	0.21	0.12	0.04	扎2	-1.61	-6.66			0.37	0.15	0.35	0.04	0.54	0.09	-	-	-	0.09	-	-	0	0	0	0	1	0.09	0.685185	58
411	23.8811	灰色泥质粉砂岩	0.2	0.13	0.03	扎7	0.13	-6.59	0.22	-6.22	0.36	0.05	0.11	0.04	0.2	0.37	-	0.06	-	0.43	-	-	0	0	0	0	0.99	0.43	1.8	59
409	24.909	棕灰色泥质粉砂岩	0.33	0.27	0.07	扎2	-2.25	-9.81			0.67	0.12	0.11	0.03	0.26	0.07	-	-	-	0.07	-	-	0	0	0	0	1	0.07	2.57692	60
410	25.1905	棕褐色细砂质泥岩	0.33	0.24	0.04	扎207	-3.23	-8.09	-3.03	-6.96	0.61	0.08	0.1	0.02	0.2	0.14	-	0.05	-	0.19	-	-	0	0	0	0	1	0.19	3.05	65
413	25.4082	灰黄色泥质粉砂岩	0.34	0.26	0.06	扎207	-1.74	-8.63			0.66	0.1	0.13	0.03	0.26	0.09	-	-	-	0.09	-	-	0	0	0	0	1.01	0.09	2.53846	72
412	25.9184	灰色含灰泥岩	0.3	0.22	0.06	扎8	-2.66	-9.28			0.58	0.08	0.12	0.08	0.28	0.11	-	-	-	0.11	-	-	0	0	0	0.03	1	0.11	2.07143	62
414	25.9145	纹层状深灰色含灰泥岩	0.3	0.18	0.05	扎4	-0.25	-7.61			0.53	0.1	0.13	0.05	0.28	0.17	-	-	-	0.17	-	-	0	0	0	0.02	1	0.17	1.89286	63	28.5714
415	26.1034	纹层状灰色泥质粉砂岩	0.26	0.2	0.04	扎4	-0.34	-8.36			0.5	0.07	0.11	0.04	0.22	0.26	-	-	-	0.26	-	-	0	0	0	0.02	1	0.26	2.27273	64
416	26.953	灰色细砂质泥岩	0.34	0.19	0.05	扎201	-1.93	-9.35			0.58	0.1	0.14	0.05	0.29	0.12	-	-	-	0.12	-	-	0	0	0	0.01	1	0.12	2	68
417	27.0233	灰色泥岩	0.35	0.25	0.06	扎3	-2.45	-10.46			0.66	0.07	0.08	0.03	0.18	0.15	-	-	-	0.15	-	-	0	0	0	0.01	1	0.15	3.66667	66
418	27.1613	深灰色粉砂质泥岩	0.29	0.15	0.05	扎206	-1.96	-10.24			0.49	0.11	0.22	0.07	0.4	0.09	-	-	-	0.09	-	-	0	0	0	0.03	1.01	0.09	1.225	61
429	27.1368	灰色含粉砂灰岩	0.17	0.09	0.04	扎204	-1.16	-7.14	-1.78	-6.56	0.3	0.08	0.1	-	0.18	0.24	-	0.26	-	0.5	-	-	0	0	0	0.02	1	0.5	1.66667	67
419	27.4225	灰色灰质粉砂岩	0.16	0.09	0.03	扎2	-0.02	-6.5	-1.35	-5.98	0.28	0.08	0.13	0.04	0.25	0.33	-	0.11	-	0.44	-	-	0	0	0	0.03	1	0.44	1.12	69
420	27.4988	浅灰色粉砂质泥岩	0.2	0.13	0.04	扎2	0.76	-7.94	0.47	-7.63	0.37	0.09	0.19	-	0.28	0.28	-	0.04	-	0.32	-	-	0	0	0	0.02	0.99	0.32	1.32143	71
421	27.5014	棕褐色泥质粉砂岩	0.28	0.14	0.05	扎203	-1.1	-8.5			0.47	0.16	0.19	-	0.35	0.18	-	-	-	0.18	-	-	0	0	0	0	1	0.18	1.34286	70
422	27.606	棕褐色粉砂质泥岩	0.34	0.25	0.05	扎203	-2.35	-9.93			0.64	0.08	0.08	0.03	0.19	0.17	-	-	-	0.17	-	-	0	0	0	0.01	1.01	0.17	3.36842	73
423	28.5582	灰色纹层状泥晶灰岩	0.14	0.09	0.03	扎5	2.08	-5.57	1.2	-4.91	0.26	0.06	0.12	0.02	0.2	0.2	-	0.09	0.25	0.54	-	-	0	0	0	0	1	0.54	1.3	75
424	28.7736	含粉砂泥晶颗粒灰岩	0.07	0.07	0.02	扎5	3.41	-5.13	3.29	-6.38	0.16	0.05	0.08	0.03	0.16	0.1	-	0.09	0.46	0.65	-	-	0	0	0	0.03	1	0.65	1	78
425	28.7838	纹层状深灰色含粉砂灰岩	0.1	0.08	0.02	扎5	3.22	-6.66	3.49	-7.37	0.2	0.06	0.1	-	0.16	0.15	-	0.04	0.44	0.63	-	-	0	0	0	0	0.99	0.63	1.25	79
426	28.7287	棕褐色粉砂质泥岩	0.27	0.16	0.04	扎202	-1.27	-8.45			0.47	0.12	0.23	0.07	0.42	0.11	-	-	-	0.11	-	-	0	0	0	0	1	0.11	1.11905	76
427	28.8627	青灰色泥质粉砂岩	0.3	0.22	0.07	扎202	-1.17	-9.24			0.59	0.14	0.16	0.03	0.33	0.08	-	-	-	0.08	-	-	0	0	0	0	1	0.08	1.78788	77
428	29.5654	棕褐色泥岩	0.27	0.17	0.04	扎201	-1.58	-9.24			0.48	0.15	0.19	0.04	0.38	0.14	-	-	-	0.14	-	-	0	0	0	0	1	0.14	1.26316	74
301	31.8288	灰色含石膏粉砂质泥岩	0.19	0.23	0.05	狮40	-1.15	-10.36			0.47	0.1	0.14	-	0.24	0.18	-	-	-	0.18	0.08	-	0.08	0	0	0.03	1	0.26	1.95833	81
310	31.911	灰色含粉砂灰岩	0.12	0.13	0.06	狮38	0.82	-3.73	0.34	-3.98	0.31	0.06	0.12	-	0.18	0.24	-	0.23	-	0.47	-	-	0	0	0	0.02	0.98	0.47	1.72222	80
308	32.2397	灰色含石膏石盐粉砂质泥岩	0.16	0.17	0.03	狮37	-2.35	-1.93	-2.4	-1.97	0.36	0.06	0.13	-	0.19	-	-	0.22	-	0.22	-	0.07	0.07	0.14	0	0.02	1	0.43	1.89474	82
311	32.6507	纹层状灰色粉砂质泥岩	0.17	0.21	0.06	狮38	-1.23	-9.85	-1.43	-9.73	0.44	0.09	0.12	-	0.21	0.27	-	0.04	-	0.31	-	-	0	0	0	0.04	1	0.31	2.09524	83
315	32.9795	灰色灰质泥岩	0.17	0.17	0.03	狮46	0.41	-6.56	-0.17	-6.79	0.37	0.09	0.11	-	0.2	0.34	-	0.06	-	0.4	-	-	0	0	0	0.02	0.99	0.4	1.85	84
302	33.0616	灰色灰质泥岩	0.15	0.19	0.04	狮40	0	-5.72	-0.05	-3.34	0.38	0.07	0.12	-	0.19	0.23	-	0.11	-	0.34	0.05	-	0.05	0	0	0.04	1	0.39	2	85
316	33.3904	灰色灰质泥岩	0.13	0.13	0.05	狮1-2	0.56	-2.24	0.12	-2.25	0.31	0.06	0.11	-	0.17	0.11	-	0.32	-	0.43	-	0.03	0.03	0.03	0	0.03	1	0.49	1.82353	86
317	34.2123	灰色灰质-膏质泥岩	0.08	0.11	-	狮48	0.58	-5.73	0.78	-5.19	0.19	0.05	0.08	-	0.13	0.2	-	0.09	-	0.29	0.39	-	0.39	0	0	0	1	0.68	1.46154	92
318	34.1301	灰色泥晶灰岩	0.13	0.15	0.04	狮43	0.08	-4.73	0.04	-3.68	0.32	0.05	0.09	-	0.14	0.22	-	0.26	-	0.48	0.03	-	0.03	0	0	0.03	1	0.51	2.28571	93
319	34.3767	灰色灰质泥岩	0.21	0.23	0.04	狮38-2	-0.88	-6.4	-1.23	-6.1	0.48	0.1	0.19	-	0.29	0.12	-	0.07	-	0.19	-	-	0	0	0	0.04	1	0.19	1.65517	87	84.2105
313	34.6233	灰色泥岩	0.22	0.32	0.07	狮38-4	-1.18	-4.26	-1.2	-4.84	0.61	0.08	0.16	-	0.24	-	-	0.09	-	0.09	-	-	0	0	0	0.05	0.99	0.09	2.54167	88
312	34.6233	灰色含石膏灰质泥岩	0.17	0.21	0.03	狮38-4	-1.26	-1.96	-1.33	-2.03	0.41	0.04	0.07	-	0.11	-	-	0.31	-	0.31	0.18	-	0.18	0	0	0	1.01	0.49	3.72727	89
314	34.7055	深灰色灰质泥岩	0.12	0.18	0.06	狮38-4	-2.66	-3.64	-3.3	-1.95	0.36	0.04	0.1	-	0.14	0.12	-	0.29	-	0.41	0.05	-	0.05	0	0	0.03	0.99	0.46	2.57143	90
320	34.8699	深灰色含石膏白云岩	0.08	0.21	0.03	狮41-6-1	-1.92	0.02	-2.01	-0.09	0.32	0.04	0.1	-	0.14	-	0.34	-	-	0.34	-	0.2	0.2	0	0	0	1	0.54	2.28571	91
304	35.5274	灰色含灰泥岩	0.23	0.2	0.04	狮49-1	-0.82	-8.21			0.47	0.09	0.22	-	0.31	0.17	-	-	-	0.17	-	-	0	0	0	0.04	0.99	0.17	1.51613	94
305	35.8562	灰色膏质泥岩	0.07	0.12	0.02	狮49-1	-0.58	-3.58	-0.51	-3.31	0.21	0.05	0.12	-	0.17	0.16	-	0.18	-	0.34	0.26	-	0.26	0	0	0.01	0.99	0.6	1.23529	98
303	35.5274	灰色灰质泥岩	0.18	0.21	0.05	狮3-1加深	-0.95	-7.09	-1.05	-5.74	0.44	0.06	0.1	-	0.16	0.25	-	0.07	-	0.32	0.05	-	0.05	0	0	0.03	1	0.37	2.75	95
306	35.9384	灰色灰质泥岩	0.16	0.31	0.04	狮203	-1.99	-7.68	-1.94	-7.81	0.51	0.06	0.13	-	0.19	0.18	-	0.04	-	0.22	0.04	-	0.04	0	0	0.04	1	0.26	2.68421	96
307	35.9384	灰色膏质泥岩	0.09	0.09	0.01	狮49	-0.75	-2.19	-1.06	-1.93	0.19	0.05	0.09	-	0.14	0.07	-	0.27	-	0.34	0.3	-	0.3	0	0	0.01	0.98	0.64	1.35714	97
201	39.4717	灰绿色泥岩	0.31	0.16	0.05	扎探2	-1.49	-5.49			0.52	0.08	0.38	-	0.46	-	-	-	-	0	-	-	0	0	0.02	0	1	0	1.13043	99
202	40.0549	深灰色含粉砂泥晶灰岩	0.15	0.11	0.02	红119	-2.4	-7.4			0.28	0.05	0.16	-	0.21	0.49	-	0.03	-	0.52	-	-	0	0	0	0	1.01	0.52	1.33333	100
203	40.1035	棕褐色泥质粉砂岩	0.49	0.18	0.03	切123	-3.09	-12.23			0.7	0.07	0.17	-	0.24	0.06	-	-	-	0.06	-	-	0	0	0	0	1	0.06	2.91667	101
204	40.1174	棕褐色粉砂质泥岩	0.44	0.16	0.03	切123	-5.88	-11.98			0.63	0.07	0.17	-	0.24	0.13	-	-	-	0.13	-	-	0	0	0	0	1	0.13	2.625	102
205	41.0773	棕褐色粉砂质泥岩	0.38	0.17	0.03	切126	-2.92	-12.97			0.58	0.08	0.18	-	0.26	0.14	-	-	-	0.14	-	-	0	0	0.01	0	0.99	0.14	2.23077	103
206	41.3777	灰白色细砂岩	0.59	0.23	0.06	切126	-3.385	-12.45			0.88	0.04	0.09	-	0.13	-	-	-	-	0	-	-	0	0	0	0	1.01	0	6.76923	104	23.0769
207	42.3801	棕褐色细砂质泥岩	0.37	0.22	0.06	切126	-3.85	-11.93			0.65	0.09	0.14	-	0.23	0.1	-	-	-	0.1	-	-	0	0	0.02	0	1	0.1	2.82609	105
208	42.6975	棕褐色含灰细砂质粉砂岩	0.31	0.26	0.05	切126	-5.84	-13.22			0.62	0.05	0.11	-	0.16	0.21	-	-	-	0.21	-	-	0	0	0.01	0	1	0.21	3.875	106
209	43.0718	浅灰色细砾岩	0.4	0.27	0.09	切126	-4.09	-14.43			0.76	0.05	0.1	-	0.15	0.11	-	-	-	0.11	-	-	0	0	0	0	1.02	0.11	5.06667	107
210	43.0628	棕褐色灰质粗砂岩	0.32	0.16	0.05	切122	-3.4	-11.12			0.53	0.09	0.1	-	0.19	0.28	-	-	-	0.28	-	-	0	0	0	0	1	0.28	2.78947	108
211	43.2902	棕红色细砾岩	0.36	0.43	0.06	切122	-4.75	-14.65			0.85	0.03	0.07	-	0.1	0.05	-	-	-	0.05	-	-	0	0	0	0	1	0.05	8.5	109
212	43.4602	棕褐色细砾岩	0.43	0.29	0.07	切122	-4.34	-12.27			0.79	0.02	0.08	-	0.1	0.1	-	-	-	0.1	-	-	0	0	0	0	0.99	0.1	7.9	110
213	43.5667	灰色灰质泥岩	0.34	0.14	0.03	切8	-1.92	-11.82			0.51	0.13	0.28	-	0.41	0.07	-	-	-	0.07	-	-	0	0	0	0	0.99	0.07	1.2439	111
							-1.66959	-7.74658			0.487207	0.0934234	0.148829	0.039	0.252793	0.172667	0.34	0.13027	0.267143	0.226667	0.143	0.1	0.0155856	0.00504505	0.00117117	0.010991	0.999459	0.247297	2.2364
							1.71895	3.05617
