# Supplementary material for: Eocene to Miocene paleoclimate reconstruction of the northern Tibetan Plateau: constraints from mineralogy, carbon and oxygen isotopes of lacustrine carbonates in the western Qaidam Basin
Source: Frontiers journal article supplement (doi:10.3389/feart.2023.1217304), 2023-06-19
Supplement: Table_2.XLS [file Table_2.XLS]

## Sheet: Ages of tectonics 
Region		Methods	Ages	References
Qilian Shan	Southern Qilian Shan	seismic reflection profiles	65-50 Ma	(Yin et al., 2008)	Yin, A., Dang, Y. Q., Zhang, M., Chen, X. H., and Mcrivette, M. W. (2008) Cenozoic tectonic evolution of the qaidam basin and its surrounding regions (part 3): structural geology, sedimentation, and regional tectonic reconstruction, Geol. Soc. Am. Bull., 120, 847-876, doi: 10.1130/B26232.1.
	Southern Qilian Shan	Apatite fission track	Early Eocene	(Qi et al., 2016)	Qi, B., Hu, D., Yang, X., Zhang, Y., and Tan, C., et al. (2016) Apatite fission track evidence for the cretaceous–cenozoic cooling history of the qilian shan (nw china) and for stepwise northeastward growth of the northeastern tibetan plateau since early eocene, J. Asian Earth Sci., 124, 28-41, doi: 10.1016/j.jseaes.2016.04.009.
	Southern Qilian Shan	apatite fission-track	60-54 Ma; 42-38 Ma; 12 Ma; 2.1 Ma	(He et al., 2018)	He, P., Song, C., Wang, Y., Meng, Q., and Chen, L., et al. (2018) Cenozoic deformation history of the qilian shan (northeastern tibetan plateau) constrained by detrital apatite fission-track thermochronology in the northeastern qaidam basin, Tectonophysics, 749, 1-11, doi: 10.1016/j.tecto.2018.10.017.
	Zongwulong Shan and the Huaitoutala section	Apatite fission-track	18-11 Ma; ~7 Ma	(Pang et al., 2019)	Pang, J., Yu, J., Zheng, D., Wang, W., and Ma, Y., et al. (2019) Neogene expansion of the qilian shan, north tibet: implications for the dynamic evolution of the tibetan plateau, Tectonics, 38, 1018-1032, doi: 10.1029/2018TC005258.
	Southern Qilian Shan	apatite and zircon U-Th/He thermochronometer, potassiumfeldspar 40Ar/39Ar multidiffusion	early-Miocene	(Zhuang et al.,2018)	Pang, J., Yu, J., Zheng, D., Wang, W., and Ma, Y., et al. (2019) Neogene expansion of the qilian shan, north tibet: implications for the dynamic evolution of the tibetan plateau, Tectonics, 38, 1018-1032, doi: 10.1029/2018TC005258.
	Southern Qilian Shan	apatite(U‐Th)/He	15-10 Ma	(Meng et al., 2020)	Meng, Q., Song, C., Nie, J., Liu, C., and He, P., et al. (2020) Middle-late miocene rapid exhumation of the southern qilian shan and implications for propagation of the tibetan plateau, Tectonophysics, 774, 228279, doi: 10.1016/j.tecto.2019.228279.
	Tuolai Shan,Northern Qilian Shan	Apatite fission-track	17-15 Ma	(Yu et al., 2019)	Yu, J., Pang, J., Wang, Y., Zheng, D., and Liu, C., et al. (2019) Mid-miocene uplift of the northern qilian shan as a result of the northward growth of the northern tibetan plateau, Geosphere, 15, 423-432, doi: 10.1130/GES01520.1.
	Northern Qilian Shan	(U‐Th)/He, apatite fission track	Laji Shan at 22 Ma; Jishi Shan at 13 Ma	(Lease et al., 2011)	Lease, R. O., Burbank, D. W., Clark, M. K., Farley, K. A., Zheng Dewen, Z. D., and Zhang, H. (2011) Middle miocene reorganization of deformation along the northeastern tibetan plateau, Geology (Boulder), 39, 359-362, doi: 10.1130/G31356.1.
	Northern Qilian Shan	Apatite fission-track	10-8Ma	(Zheng et al., 2017)	Zheng D W, Wang W T, Wan J L, et al. 2017. Progressive Northward Growth of the Northern Qilian Shan-Hexi Corridor (Northeastern Tibet) During the Cenozoic[J]. Lithosphere, 9(3): 408-416. doi:10.1130/L587.1.
	Northern Qilian Shan	apatite- and zircon fission track	15-10Ma	(Li et al.,2019)	Li B, Chen X, Zuza A V, et al. 2019. Cenozoic Cooling History of the North Qilian Shan, Northern Tibetan Plateau, and the Initiation of the Haiyuan Fault: Constraints From Apatite- And Zircon-Fission Track Thermochronology[J]. Tectonophysics, 751: 109-124. doi:10.1016/j.tecto.2018.12.005.
	Hongliugou Section	apatite fission-track	10Ma	(He et al.,2021)	He P, Song C, Wang Y, et al. 2021. Intensified Late Miocene Deformation in the Northern Qaidam Basin, Northern Tibetan Plateau, Constrained by Apatite Fission-Track Thermochronology[J]. Frontiers in Earth Science, 9. doi:10.3389/feart.2021.750993.
	Northern Qilian Shan	apatite (U-Th)/He	10Ma	(Zheng et al., 2010)	Zheng D W, Clark M K, Zhang P Z, et al. 2010. Erosion, Fault Initiation and Topographic Growth of the North Qilian Shan (Northern Tibetan Plateau)[J]. GEOSPHERE, 6(6): 937-941. doi:10.1130/GES00523.1.
	Nan Shan thrust belt, North Qaidam thrust	Apatite fission-track ,Magnetostratigraphies	49, 33Ma	(Yin et al., 2002)	Yin A, Rumelhart P E, Butler R, et al. 2002. Tectonic History of the Altyn Tagh Fault System in Northern Tibet Inferred From Cenozoic Sedimentation[J]. Geological Society of America Bulletin, 114(10): 1257-1295. doi:DOI 10.1130/0016-7606(2002)114<1257:THOTAT>2.0.CO;2.
	Caogou section from the Jiuxi Basin	sedimentology,Apatite fission-track	13.5, 10.5Ma	(Wang et al., 2016)	Wang W, Zhang P, Pang J, et al. 2016. The Cenozoic Growth of the Qilian Shan in the Northeastern Tibetan Plateau: A Sedimentary Archive From the Jiuxi Basin[J]. Journal of Geophysical Research: Solid Earth, 121(4): 2235-2257. doi:10.1002/2015JB012689.
	Northern Qilian Shan and Jiuxi basin	Apatite fission-track, virtrinit-reflectance	20-10 Ma	(Gorge et al., 2001)	George A D, Marshallsea S J, Wyrwoll K, et al. 2001. Miocene Cooling in the Northern Qilian Shan, Northeastern Margin of the Tibetan Plateau, Revealed by Apatite Fission-Track and Vitrinite-Reflectance Analysis[J]. Geology (Boulder), 29(10): 939-942. doi:10.1130/0091-7613(2001)029<0939:MCITNQ>2.0.CO;2.
	Yumu Shan	palaeomagnetic dating	9.8–9.6Ma	(Fang et al., 2013)	Fang X, Liu D, Song C, et al. 2013. Oligocene Slow and Miocene–Quaternary Rapid Deformation and Uplift of the Yumu Shan and North Qilian Shan: Evidence From High-Resolution Magnetostratigraphy and Tectonosedimentology[J]. Geological Society, London, Special Publications, 373(1): 149-171. doi:10.1144/SP373.5.
	Northern and Central Qilian Shan	Low-temperature thermochronometry	Eocene-Oligocene，16Ma	(Li et al., 2020)	Li B, Zuza A V, Chen X, et al. 2020. Cenozoic Multi-Phase Deformation in the Qilian Shan and Out-of-Sequence Development of the Northern Tibetan Plateau[J]. Tectonophysics, 782-783: 228423. doi:10.1016/j.tecto.2020.228423.
	Eastern Qilian Shan	Low-temperature thermochronometry	~15 Ma	(Wang et al., 2020)	Wang W, Zheng D, Li C, et al. 2020. Cenozoic Exhumation of the Qilian Shan in the Northeastern Tibetan Plateau: Evidence From Low‐Temperature Thermochronology[J]. Tectonics, 39(4). doi:10.1029/2019TC005705.
	Qilian Shan	U-Pb Provenance analysis, seismic prifiles	Paleogene; Miocene	(Cheng et al., 2019)	Cheng F, Garzione C N, Mitra G, et al. 2019. The Interplay Between Climate and Tectonics During the Upward and Outward Growth of the Qilian Shan Orogenic Wedge, Northern Tibetan Plateau[J]. Earth-Science Reviews, 198: 102945. doi:10.1016/j.earscirev.2019.102945.
	Central Qilian Shan	apatite fission-track	17-14Ma	(Zheng et al., 2017)	Zheng D W, Wang W T, Wan J L, et al. 2017. Progressive Northward Growth of the Northern Qilian Shan-Hexi Corridor (Northeastern Tibet) During the Cenozoic[J]. Lithosphere, 9(3): 408-416. doi:10.1130/L587.1.
	Yumen Basin, Northern Qilian Shan	detrital zircon U-Pb ages	16Ma	(Wang et al., 2016)	Wang W, Zhang P, Yu J, et al. 2016. Constraints On Mountain Building in the Northeastern Tibet: Detrital Zircon Records From Synorogenic Deposits in the Yumen Basin[J]. Scientific Reports, 6(1). doi:10.1038/srep27604.
	Hongshan section,Qilian Shan	Magnetostratigraphies, detrital apatite fission-track ages	two-stage:30,10Ma	(Wang et al., 2022)	Wang W, Zhang P, Garzione C N, et al. 2022. Pulsed Rise and Growth of the Tibetan Plateau to its Northern Margin Since Ca. 30 Ma[J]. Proceedings of the National Academy of Sciences, 119(8). doi:10.1073/pnas.2120364119.
	Hongsanhan section	magnetostratigraphy	30Ma	(Sun et al.,2005)	Sun Z, Yang Z, Pei J, et al. 2005. Magnetostratigraphy of Paleogene Sediments From Northern Qaidam Basin, China: Implications for Tectonic Uplift and Block Rotation in Northern Tibetan Plateau[J]. Earth and Planetary Science Letters, 237(3-4): 635-646. doi:10.1016/j.epsl.2005.07.007.
	Qilian Shan	Fission-track analysis on zircons and apatites	9-5Ma	(Jolivet et al., 2001)	Jolivet M, Brunel M, Seward D, et al. 2001. Mesozoic and Cenozoic Tectonics of the Northern Edge of the Tibetan Plateau: Fission-Track Constraints[J]. Tectonophysics, 343(1): 111-134. doi:https://doi.org/10.1016/S0040-1951(01)00196-2.
	Tiejianggou section, Subei,Danghe Nanshan	Apatite fission-track	14Ma	(Lin et al., 2015)	Lin X, Zheng D, Sun J, et al. 2015. Detrital Apatite Fission Track Evidence for Provenance Change in the Subei Basin and Implications for the Tectonic Uplift of the Danghe Nan Shan (Nw China) Since the Mid-Miocene[J]. Journal of Asian Earth Sciences, 111: 302-311. doi:10.1016/j.jseaes.2015.07.007.
	Qilian Shan	(U‐Th)/He	11.5-7.1Ma	(Johnstone et al., 2009)	Johnstone S, Hourigan J K, Zhuang G, et al. 2009.Miocene Exhumation of the Northern and Southern Qilian Shan, N. China; Results From Apatite U-Th/He Thermochronology[Z]. T43B-T2066B.
	Huaitoutala area	provenance analysis	middle-late Miocene（13-8Ma)	(Li et al.,2021)	Li C, Zheng D, Zhou R, et al. 2021. Topographic Growth of the Northeastern Tibetan Plateau During the Middle‐Late Miocene: Insights From Integrated Provenance Analysis in the Ne Qaidam Basin[J]. Basin Research, 33(6): 3212-3230. doi:10.1111/bre.12600.
	Dahonggou section	Magnetostratigraphy, sedimentology	12Ma	(Lu and Xiong,2009)	Lu H, Xiong S. 2009. Magnetostratigraphy of the Dahonggou Section, Northern Qaidam Basin and its Bearing On Cenozoic Tectonic Evolution of the Qilian Shan and Altyn Tagh Fault[J]. Earth and Planetary Science Letters, 288(3-4): 539-550. doi:10.1016/j.epsl.2009.10.016.
	Dahonggou section	magnetostratigraphy, sediment provenance	18.5Ma	(Nie et al., 2019)	Nie J, Ren X, Saylor J E, et al. 2019. Magnetic Polarity Stratigraphy, Provenance, and Paleoclimate Analysis of Cenozoic Strata in the Qaidam Basin, Ne Tibetan Plateau[J]. GSA Bulletin, 132(1-2): 310-320. doi:10.1130/B35175.1.
	Dahonggou section	sedimentation,depositional patterns and multiproxy detrital provenance	middle Eocene–middle Miocene	(Bush et al.,2016)	Bush M A, Saylor J E, Horton B K, et al. 2016. Growth of the Qaidam Basin During Cenozoic Exhumation in the Northern Tibetan Plateau: Inferences From Depositional Patterns and Multiproxy Detrital Provenance Signatures[J]. Lithosphere, 8(1): 58-82. doi:10.1130/L449.1.
	Honggou anticline	magnetostratigraphy	12Ma	(Wang et al., 2017)	Wang W, Zheng W, Zhang P, et al. 2017. Expansion of the Tibetan Plateau During the Neogene[J]. Nature Communications, 8(1). doi:10.1038/ncomms15887.
	Danghe area	biostratigraphy, sedimentation	12-9Ma	(Wang et al.,2003)	Wang X, Wang B, Qiu Z, et al. 2003. Danghe Area (Western Gansu, China) Biostratigraphy and Implications for Depositional History and Tectonics of Northern Tibetan Plateau[J]. Earth and Planetary Science Letters, 208(3-4): 253-269. doi:10.1016/S0012-821X(03)00047-5.
	Huaitoutala section	magnetostratigraphy	14.7, 8.1, 3.6Ma	(Fang et al., 2007)	Fang X, Zhang W, Meng Q, et al. 2007. High-Resolution Magnetostratigraphy of the Neogene Huaitoutala Section in the Eastern Qaidam Basin On the Ne Tibetan Plateau, Qinghai Province, China and its Implication On Tectonic Uplift of the Ne Tibetan Plateau[J]. Earth and Planetary Science Letters, 258(1-2): 293-306. doi:10.1016/j.epsl.2007.03.042.
	western Gonghe and eastern Qaidam Basins,Elashan Range	magnetostratigraphy, Apatite fission-track	10, 6Ma	(Lu et al.,2012)	Lu H, Wang E, Shi X, et al. 2012. Cenozoic Tectonic Evolution of the Elashan Range and its Surroundings, Northern Tibetan Plateau as Constrained by Paleomagnetism and Apatite Fission Track Analyses[J]. Tectonophysics, 580: 150-161. doi:10.1016/j.tecto.2012.09.013.
	Huaitoutala section ;Qilian Shan	Detrital zircon U‐Pb data;tetraether‐based paleothermometry	Qilian Shan has been uplifted since 15.8 Ma;significant relief since 12.4Ma.	(Zhuang et al., 2019)	Zhuang G, Zhang Y G, Hourigan J, et al. 2019. Microbial and Geochronologic Constraints On the Neogene Paleotopography of Northern Tibetan Plateau[J]. Geophysical Research Letters, 46(3): 1312-1319. doi:10.1029/2018GL081505.
Eastern Kunlun Shan	Eastern Kunlun Shan	apatite(U‐Th)/He	early Cenozoic	(Clark et al., 2010)	Clark M K, Farley K A, Zheng D, et al. 2010. Early Cenozoic Faulting of the Northern Tibetan Plateau Margin From Apatite (U–Th)/He Ages[J]. Earth and Planetary Science Letters, 296(1-2): 78-88. doi:10.1016/j.epsl.2010.04.051.
	Eastern Kunlun Shan	seismic reflection profiles	30-20Ma	(Yin et al., 2008)	Yin, A., Dang, Y. Q., Zhang, M., Chen, X. H., and Mcrivette, M. W. (2008) Cenozoic tectonic evolution of the qaidam basin and its surrounding regions (part 3): structural geology, sedimentation, and regional tectonic reconstruction, Geol. Soc. Am. Bull., 120, 847-876, doi: 10.1130/B26232.1.
	Eastern Kunlun Shan	40Ar/39Ar; (U-Th)/He	~40 Ma	(Wang et al., 2016)	Wang F, Feng H, Shi W, et al. 2016. Relief History and Denudation Evolution of the Northern Tibet Margin: Constraints From 40Ar/39Ar and (U–Th)/He Dating and Implications for Far-Field Effect of Rising Plateau[J]. Tectonophysics, 675: 196-208. doi:10.1016/j.tecto.2016.03.001.
	Eastern Kunlun Shan	apatite (U-Th)/He	25Ma	(Li et al.,2021)	Li C, Zheng D, Zhou R, et al. 2021. Late Oligocene Tectonic Uplift of the East Kunlun Shan: Expansion of the Northeastern Tibetan Plateau[J]. Geophysical Research Letters, 48(3). doi:10.1029/2020GL091281.
	Eastern Kunlun Shan	sandstone-composition analysis, U-Pb detrital-zircon dating, and apatite fission-track	Since 30-20 Ma	(McRivette et al., 2019)	Mcrivette M W, Yin A, Chen X, et al. 2019. Cenozoic Basin Evolution of the Central Tibetan Plateau as Constrained by U-Pb Detrital Zircon Geochronology, Sandstone Petrology, and Fission-Track Thermochronology[J]. Tectonophysics, 751: 150-179. doi:10.1016/j.tecto.2018.12.015.
	Eastern Kunlun Shan	40Ar/39Ar thermochronology on granitoids	30Ma	(Mock et al., 1999)	Mock C, Arnaud N O, Cantagrel J. 1999. An Early Unroofing in Northeastern Tibet? Constraints From 40Ar/39Ar Thermochronology On Granitoids From the Eastern Kunlun Range (Qianghai, Nw China)[J]. Earth and Planetary Science Letters, 171(1): 107-122. doi:https://doi.org/10.1016/S0012-821X(99)00133-8.
	Buqingshan and Dulan, Eastern Kunlun Shan	apatite fission-track	20Ma	(Yuan et al.,2006)	Yuan W, Dong J, Shicheng W, et al. 2006. Apatite Fission Track Evidence for Neogene Uplift in the Eastern Kunlun Mountains, Northern Qinghai–Tibet Plateau, China[J]. Journal of Asian Earth Sciences, 27(6): 847-856. doi:10.1016/j.jseaes.2005.09.002.
	Eastern Kunlun Shan	apatite fission-track	early-middle Miocene	(Wu et al., 2021)	Wu C, Li J, Ding L. 2021. Low-Temperature Thermochronology Constraints On the Evolution of the Eastern Kunlun Range, Northern Tibetan Plateau[J]. Geosphere, 17(4): 1193-1213. doi:10.1130/GES02358.1.
	Eastern Kunlun Shan	apatite fission-track	20 Ma	(Wu et al., 2019a)	Wu C, Zuza A V, Zhou Z, et al. 2019. Mesozoic-Cenozoic Evolution of the Eastern Kunlun Range, Central Tibet, and Implications for Basin Evolution During the Indo-Asian Collision[J]. Lithosphere, 11(4): 524-550. doi:10.1130/L1065.1.
	Jingyu basin, Western Kunlun Shan	Petrography and Thermobarometry of Xenoliths From Shoshonites	15Ma	(Jolivet et al., 2003)	Jolivet M, Brunel M, Seward D, et al. 2003. Neogene Extension and Volcanism in the Kunlun Fault Zone, Northern Tibet: New Constraints On the Age of the Kunlun Fault[J]. Tectonics, 22(5): n/a-n/a. doi:10.1029/2002TC001428.
	the Eastern Kunlun	U-Pb dating of detrital zircons	Miocene	(Cheng et al.,2016)	Cheng F, Fu S T, Jolivet M, et al. 2016. Source to Sink Relation Between the Eastern Kunlun Range and the Qaidam Basin, Northern Tibetan Plateau, During the Cenozoic[J]. Geological Society of America Bulletin, 128(1-2): 258-283. doi:10.1130/B31260.1.
	Kunlun faults	fission-track	40 ± 10 Ma，9-5Ma	(Jolivet et al., 2001)	Jolivet M, Brunel M, Seward D, et al. 2001. Mesozoic and Cenozoic Tectonics of the Northern Edge of the Tibetan Plateau: Fission-Track Constraints[J]. Tectonophysics, 343(1): 111-134. doi:https://doi.org/10.1016/S0040-1951(01)00196-2.
	Qiman Tagh and Eastern Kunlun	isopach maps, seismic sections and sedimentary analysis	22, 14.9Ma	(Mao et al.,2014)	Mao L, Xiao A, Wu L, et al. 2014. Cenozoic Tectonic and Sedimentary Evolution of Southern Qaidam Basin, Ne Tibetan Plateau and its Implication for the Rejuvenation of Eastern Kunlun Mountains[J]. Science China Earth Sciences, 57(11): 2726-2739. doi:10.1007/s11430-014-4951-z.
	Dahonggou section	sedimentation,depositional patterns and multiproxy detrital provenance	late Paleocene–early Eocene	(Bush et al.,2016)	Bush M A, Saylor J E, Horton B K, et al. 2016. Growth of the Qaidam Basin During Cenozoic Exhumation in the Northern Tibetan Plateau: Inferences From Depositional Patterns and Multiproxy Detrital Provenance Signatures[J]. Lithosphere, 8(1): 58-82. doi:10.1130/L449.1.
	Kunlun and Haiyuan fault	Low-temperature thermochronometry	Western part at 12-8 Ma; central part at 20-15 Ma; eastern part at 8-5 Ma	(Duvall et al., 2013)	Duvall A R, Clark M K, Kirby E, et al. 2013. Low-Temperature Thermochronometry Along the Kunlun and Haiyuan Faults, Ne Tibetan Plateau: Evidence for Kinematic Change During Late-Stage Orogenesis[J]. Tectonics, 32(5): 1190-1211. doi:10.1002/tect.20072.
	Nachitai	40Ar/39Ar	32Ma	(Liu et al.,2005)	Liu Y, Genser J, Neubauer F, et al. 2005. 40Ar/39Ar Mineral Ages From Basement Rocks in the Eastern Kunlun Mountains, Nw China, and their Tectonic Implications[J]. Tectonophysics, 398(3-4): 199-224. doi:10.1016/j.tecto.2005.02.007.
	Xidatan fault,Kunlun fault	apatite (U‐Th)/He, apatite fission track, and zircon (U‐Th)/He ages	65-50 Ma; 23-20 Ma,middle Miocene	(Staisch et al., 2020)	Staisch L M, Niemi N A, Clark M K, et al. 2020. The Cenozoic Evolution of Crustal Shortening and Left‐Lateral Shear in the Central East Kunlun Shan: Implications for the Uplift History of the Tibetan Plateau[J]. Tectonics, 39(9). doi:10.1029/2020TC006065.
Altyn Tagh Shan	Pingding Shan	seismic reflection	16.9-15.3 Ma	(Wu et al., 2019b)	Wu L, Lin X, Cowgill E, et al. 2019. Middle Miocene Reorganization of the Altyn Tagh Fault System, Northern Tibetan Plateau[J]. GSA Bulletin, 131(7-8): 1157-1178. doi:10.1130/B31875.1.
	Janggalsay section, southeast Tarim basin	magnetostratigraphy	22Ma,16Ma	(Lu et al.,2014)	Lu H, Wang E, Meng K. 2014. Paleomagnetism and Anisotropy of Magnetic Susceptibility of the Tertiary Janggalsay Section (Southeast Tarim Basin): Implications for Miocene Tectonic Evolution of the Altyn Tagh Range[J]. Tectonophysics, 618: 67-78. doi:10.1016/j.tecto.2014.01.031.
	Tarim and Qaidam basins, Altyn Tagh	stratigraphic correlation	Oligocene	(Meng et al.,2001)	Meng Q, Hu J, Yang F. 2001. Timing and Magnitude of Displacement On the Altyn Tagh Fault: Constraints From Stratigraphic Correlation of Adjoining Tarim and Qaidam Basins, Nw China[J]. Terra Nova, 13(2): 86-91. doi:10.1046/j.1365-3121.2001.00320.x.
	Altyn Tagh	sedimentation	Oligocene	(Hanson,1999)	Hanson A. 1999. Organic Geochemistry and Petroleum Geology, Tectonics and Basin Analysis of Southern Tarim and Northern Qaidam Basins, Northwest China[D]. Stanford University, Stanford California: 388.
	Xorkol Basin	time-displacement curve	late Oligocene-earliest Miocene	(Yue et al.,2001)	Yue Y J, Ritts B D, Graham S A. 2001. Initiation and Long-Term Slip History of the Altyn Tagh Fault[J]. International Geology Review, 43(12): 1087-1093. doi:DOI 10.1080/00206810109465062.
	Xorkol basin，north of the Altyn Tagh fault	SHRIMP zircon dating	the end of Early Miocene	(Yue et al.,2004)	Yue Y, Ritts B D, Graham S A, et al. 2004. Slowing Extrusion Tectonics: Lowered Estimate of Post-Early Miocene Slip Rate for the Altyn Tagh Fault[J]. Earth and Planetary Science Letters, 217(1-2): 111-122. doi:10.1016/S0012-821X(03)00544-2.
	Xorkol, Aksay, and Subei basins	sedimentation	Miocene	(Ritts et al.,2004)	Ritts B D, Yue Y, Graham S A. 2004. Oligocene‐Miocene Tectonics and Sedimentation Along the Altyn Tagh Fault, Northern Tibetan Plateau: Analysis of the Xorkol, Subei, and Aksay Basins[J]. The Journal of Geology, 112(2): 207-229. doi:10.1086/381658.
	Altyn Tagh	sedimentation,depositional patterns and detrital provenance	early Miocene，20Ma	(Ding et al.,2022)	Ding X, Fu L, Guan P, et al. 2022. The Southwestern Boundary of Cenozoic Qaidam Basin: Constraints From Heavy Mineral Analysis[J]. Minerals, 12(6): 768. doi:10.3390/min12060768.
	Ganchaigou anticline	sedimentation	36–15 Ma,15Ma	(Wu et al.,2012)	Wu L, Xiao A, Yang S, et al. 2012. Two-Stage Evolution of the Altyn Tagh Fault During the Cenozoic: New Insight From Provenance Analysis of a Geological Section in Nw Qaidam Basin, Nw China[J]. Terra Nova, 24(5): 387-395. doi:10.1111/j.1365-3121.2012.01077.x.
	Miran River	sedimentation	15 Ma	(Ritt et al., 2008)	Ritts B D, Yue Y, Graham S A, et al. 2008. From Sea Level to High Elevation in 15 Million Years:Uplift History of the Northern Tibetan Plateau Margin in the Altun Shan[J]. American Journal of Science, 308(5): 657-678. doi:10.2475/05.2008.01.
	Tiejianggou	molasse deposits	13.7 Ma	(Sun et al., 2005)	Sun J, Zhu R, An Z. 2005. Tectonic Uplift in the Northern Tibetan Plateau Since 13.7 Ma Ago Inferred From Molasse Deposits Along the Altyn Tagh Fault[J]. Earth and Planetary Science Letters, 235(3-4): 641-653. doi:10.1016/j.epsl.2005.04.034.
	Qiemo, Ruoqiang, Dangjin, Subei	(U‐Th)/He	20 ± 2 Ma; 7-5.5 Ma	(Shi et al., 2018)	Shi W, Wang F, Yang L, et al. 2018. Diachronous Growth of the Altyn Tagh Mountains: Constraints On Propagation of the Northern Tibetan Margin From (U-Th)/He Dating[J]. Journal of Geophysical Research: Solid Earth, 123(7): 6000-6018. doi:10.1029/2017JB014844.
	Dangjin Pass	40Ar/39Ar dating	100-85;40-25;10-8Ma	(Liu et al.,2007)	Liu Y, Neubauer F, Genser J, et al. 2007. Geochronology of the Initiation and Displacement of the Altyn Strike-Slip Fault, Western China[J]. Journal of Asian Earth Sciences, 29(2-3): 243-252. doi:10.1016/j.jseaes.2006.03.002.
	Xishuigou section	sedimentation	12Ma	(Lu and Xiong,2009)	Lu H, Xiong S. 2009. Magnetostratigraphy of the Dahonggou Section, Northern Qaidam Basin and its Bearing On Cenozoic Tectonic Evolution of the Qilian Shan and Altyn Tagh Fault[J]. Earth and Planetary Science Letters, 288(3-4): 539-550. doi:10.1016/j.epsl.2009.10.016.
	Qimen Tagh	apatite fission track	~ 40–30 Ma	(Liu et al., 2017)	Liu D, Li H, Sun Z, et al. 2017. Aft Dating Constrains the Cenozoic Uplift of the Qimen Tagh Mountains, Northeast Tibetan Plateau, Comparison with La-Icpms Zircon U–Pb Ages[J]. Gondwana Research, 41: 438-450. doi:https://doi.org/10.1016/j.gr.2015.10.008.
	Akatengnengshan and Youshsha anticlines	paleomagnetic rotation	16-11 Ma	(Li et al.,2017)	Li B, Yan M, Zhang W, et al. 2017. New Paleomagnetic Constraints On Middle Miocene Strike-Slip Faulting Along the Middle Altyn Tagh Fault[J]. Journal of Geophysical Research: Solid Earth, 122(6): 4106-4122. doi:10.1002/2017JB014058.
	Tula, Subei, Altyn Tagh	Apatite fission-track	33, 8Ma	(Zhang et al.,2012)	Zhang Z C, Guo Z J, Li J F, et al. 2012. Mesozoic and Cenozoic Uplift Denudation Along the Altyn Tagh Fault, Northwestern China: Constraints From Apatite Fission Track Data[J]. Quaternary Sciences, 32(3): 499-509.
	Altyn Tagh	Apatite fission-track	10Ma	(Jolivet et al., 1999)	Jolivet M, Roger F, Arnaud N, et al. 1999. Exhumation History of the Altun Shan with Evidence for the Timing of the Subduction of the Tarim Block Beneath the Altyn Tagh System, North Tibet[J]. Comptes Rendus de l Académie des Sciences - Series IIA - Earth and Planetary Science, 329(10): 749-755. doi:info:doi/10.1016/S1251-8050(00)88495-5.
	Altyn Tagh	Apatite fission-track	40 ± 10 Ma，9-5Ma	(Jolivet et al.,2001)	Jolivet M, Brunel M, Seward D, et al. 2001. Mesozoic and Cenozoic Tectonics of the Northern Edge of the Tibetan Plateau: Fission-Track Constraints[J]. Tectonophysics, 343(1): 111-134. doi:https://doi.org/10.1016/S0040-1951(01)00196-2.
	Huatugou section	Magnetostratigraphy	15Ma	(Chang et al.,2015)	Chang H, Li L, Qiang X, et al. 2015. Magnetostratigraphy of Cenozoic Deposits in the Western Qaidam Basin and its Implication for the Surface Uplift of the Northeastern Margin of the Tibetan Plateau[J]. Earth and Planetary Science Letters, 430: 271-283. doi:10.1016/j.epsl.2015.08.029.
	Danghe area	biostratigraphy, sedimentation	12-9Ma	(Wang et al.,2003)	Wang X, Wang B, Qiu Z, et al. 2003. Danghe Area (Western Gansu, China) Biostratigraphy and Implications for Depositional History and Tectonics of Northern Tibetan Plateau[J]. Earth and Planetary Science Letters, 208(3-4): 253-269. doi:10.1016/S0012-821X(03)00047-5.
	Youshashan anticlines	Apatite fission-track	31Ma	(Wang et al.,2006)	Wang E, Xu F Y, Zhou J X, et al. 2006. Eastward Migration of the Qaidam Basin and its Implications for Cenozoic Evolution of the Altyn Tagh Fault and Associated River Systems[J]. Geological Society of America Bulletin, 118(3-4): 349-365. doi:10.1130/B25778.1.
	Daban section,Suerkuli Basin	Magnetostratigraphy	3.2Ma	(Chang et al.,2012)	Chang H, Ao H, An Z, et al. 2012. Magnetostratigraphy of the Suerkuli Basin Indicates Pliocene (3.2Ma) Activity of the Middle Altyn Tagh Fault, Northern Tibetan Plateau[J]. Journal of Asian Earth Sciences, 44: 169-175. doi:10.1016/j.jseaes.2011.10.013.
	Xorkol area	lithologic variation and the presence of unconformities	Early Oligocene	(Chen et al.,2004)	Chen Z L, Wang X F, Yin A, et al. 2004. Cenozoic Left-Slip Motion Along the Central Altyn Tagh Fault as Inferred From the Sedimentary Record[J]. INTERNATIONAL GEOLOGY REVIEW, 46(9): 839-856. doi:DOI 10.2747/0020-6814.46.9.839.
	Altyn Tagh	Detrital zircon fission track, sedimentary record	Paleogene-Early Eocene, 65 Ma and 44 Ma	(Wang et al.,2015)	Wang Y, Zheng J, Zheng Y, et al. 2015. Paleocene‐Early Eocene Uplift of the Altyn Tagh Mountain: Evidence From Detrital Zircon Fission Track Analysis and Seismic Sections in the Northwestern Qaidam Basin[J]. Journal of Geophysical Research: Solid Earth, 120(12): 8534-8550. doi:10.1002/2015JB011922.
	Qigequan section	magnetostratigraphy	8.2Ma	(Zhang et al.,2013)	Zhang W, Fang X, Song C, et al. 2013. Late Neogene Magnetostratigraphy in the Western Qaidam Basin (Ne Tibetan Plateau) and its Constraints On Active Tectonic Uplift and Progressive Evolution of Growth Strata[J]. Tectonophysics, 599: 107-116. doi:10.1016/j.tecto.2013.04.010.
	Honggouzi section	rock magnetism and growth strata studies	10Ma	(Zhang et al.,2016)	Zhang T, Han W, Fang X, et al. 2016. Intensified Tectonic Deformation and Uplift of the Altyn Tagh Range Recorded by Rock Magnetism and Growth Strata Studies of the Western Qaidam Basin, Ne Tibetan Plateau[J]. Global and Planetary Change, 137: 54-68. doi:10.1016/j.gloplacha.2015.12.017.
	Qaidam basin, Hexi Corridor, and Subei basin	sedimentology, stratigraphy, and provenance analysis	post-early Miocene	(Zhuang et al.,2011)	Zhuang G, Hourigan J K, Ritts B D, et al. 2011. Cenozoic Multiple-Phase Tectonic Evolution of the Northern Tibetan Plateau: Constraints From Sedimentary Records From Qaidam Basin, Hexi Corridor, and Subei Basin, Northwest China[J]. American Journal of Science, 311(2): 116-152. doi:10.2475/02.2011.02.
	Altyn Tagh	Apatite fission-track ,Magnetostratigraphies	49Ma	(Yin et al., 2002)	Yin A, Rumelhart P E, Butler R, et al. 2002. Tectonic History of the Altyn Tagh Fault System in Northern Tibet Inferred From Cenozoic Sedimentation[J]. Geological Society of America Bulletin, 114(10): 1257-1295. doi:DOI 10.1130/0016-7606(2002)114<1257:THOTAT>2.0.CO;2.
	Altyn Tagh	U-Pb dating of detrital zircons	Miocene	(Cheng et al.,2016)	Cheng F, Fu S T, Jolivet M, et al. 2016. Source to Sink Relation Between the Eastern Kunlun Range and the Qaidam Basin, Northern Tibetan Plateau, During the Cenozoic[J]. Geological Society of America Bulletin, 128(1-2): 258-283. doi:10.1130/B31260.1.
	Altyn Tagh	Apatite fission-track	15.7	(Cowgill,2001)	Cowgill E S. 2001. Tectonic Evolution of the Altyn Tagh-Western Kunlun Fault System, Northwestern China[D]. University of California, Los Angeles.
